# Supplementary material for: Testing the Ortholog Conjecture with Comparative Functional Genomic Data from Mammals
Source: PubMed Central journal article supplement (PMC3111532; doi:10.1371/journal.pcbi.1002073), 2011-06-09
Supplement: pcbi.1002073.s002.pdf [file pcbi.1002073.s002.pdf]

Figure S2A

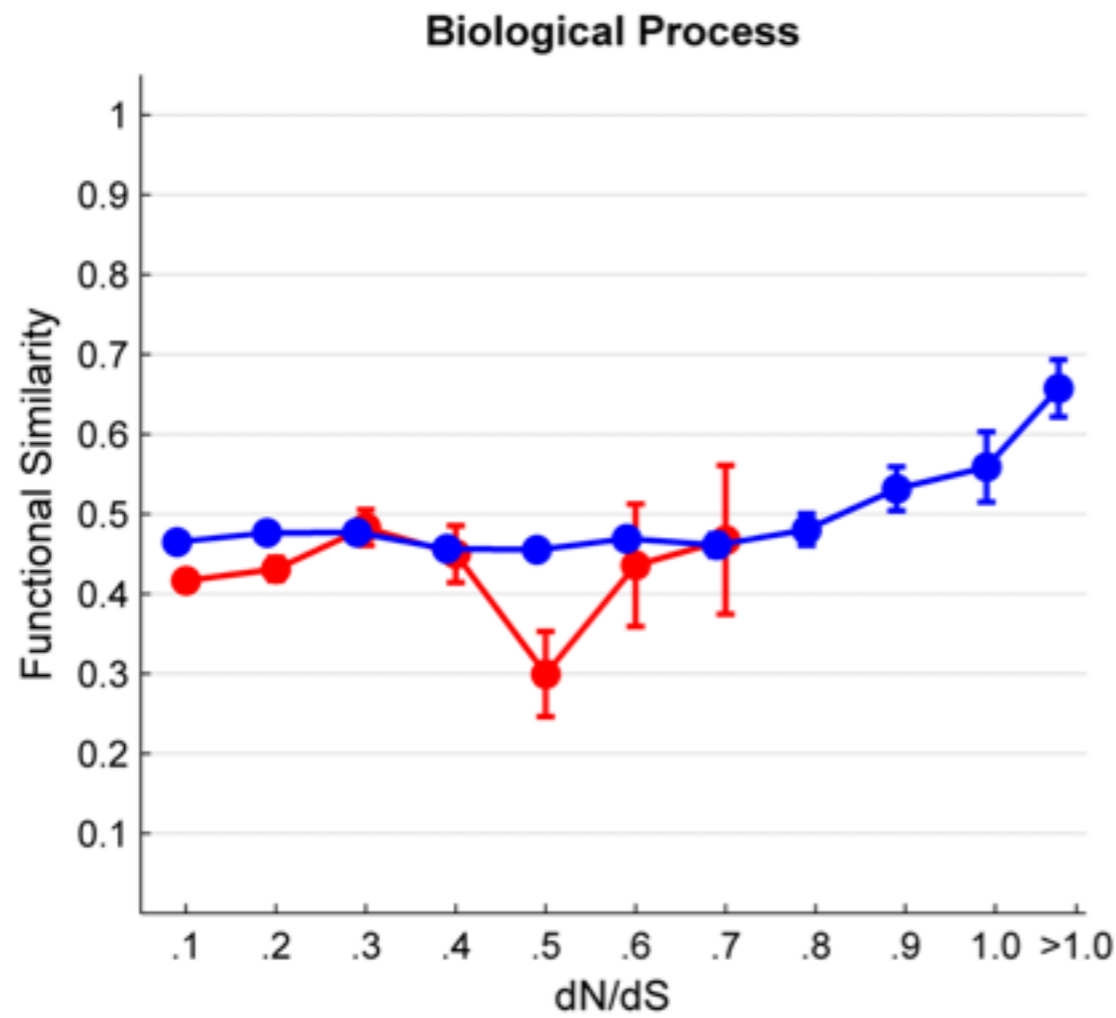

Ortho: (1804) Bins: (1075)(431)(167)(83)(27)(13)(8)(0)(0)(0)(0)  
 Para: (11225) Bins: (3372)(1419)(1658)(1563)(1309)(832)(514)(269)(138)(57)(94)

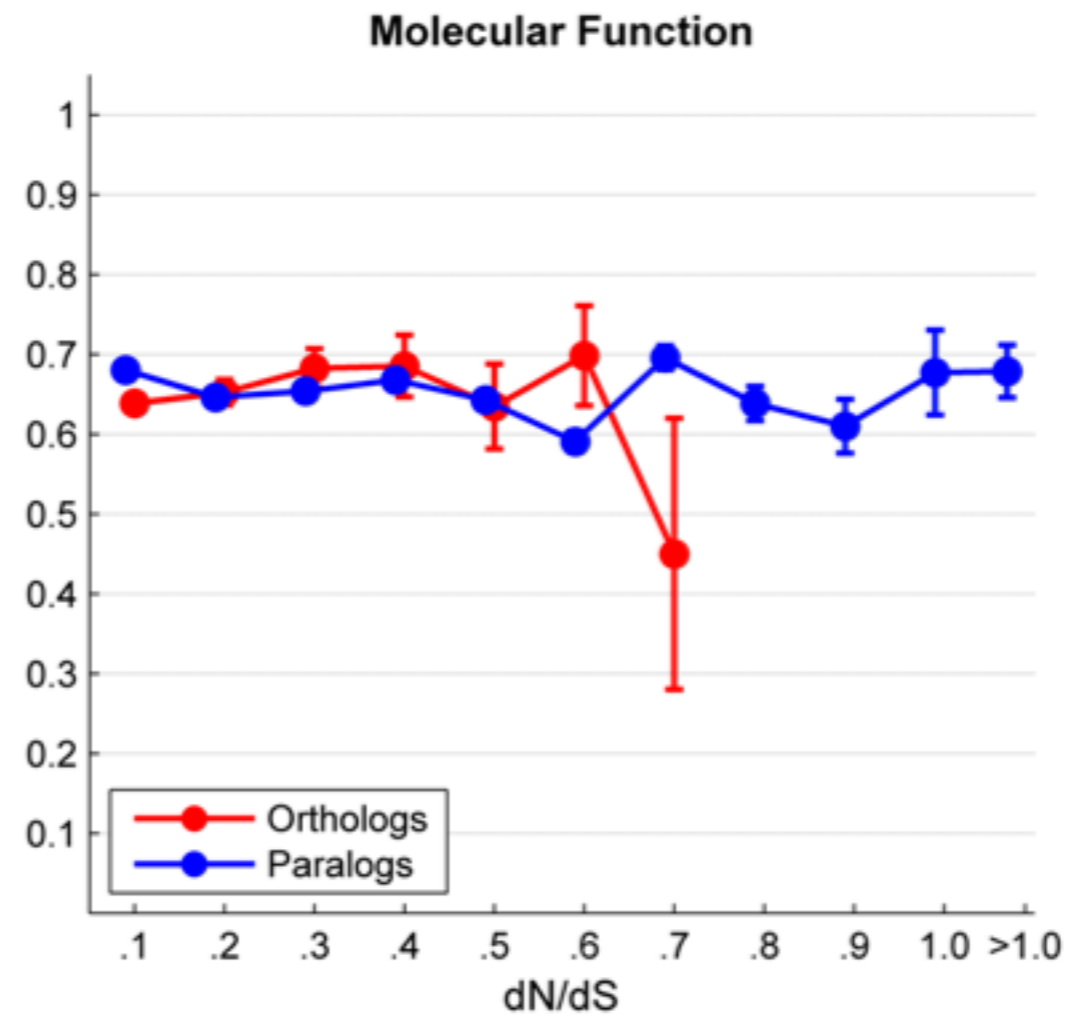

Ortho: (1767) Bins: (1096)(424)(137)(65)(27)(12)(6)(0)(0)(0)(0)  
 Para: (10613) Bins: (3426)(1421)(1523)(1458)(1140)(731)(454)(231)(106)(44)(79)

Figure S2B

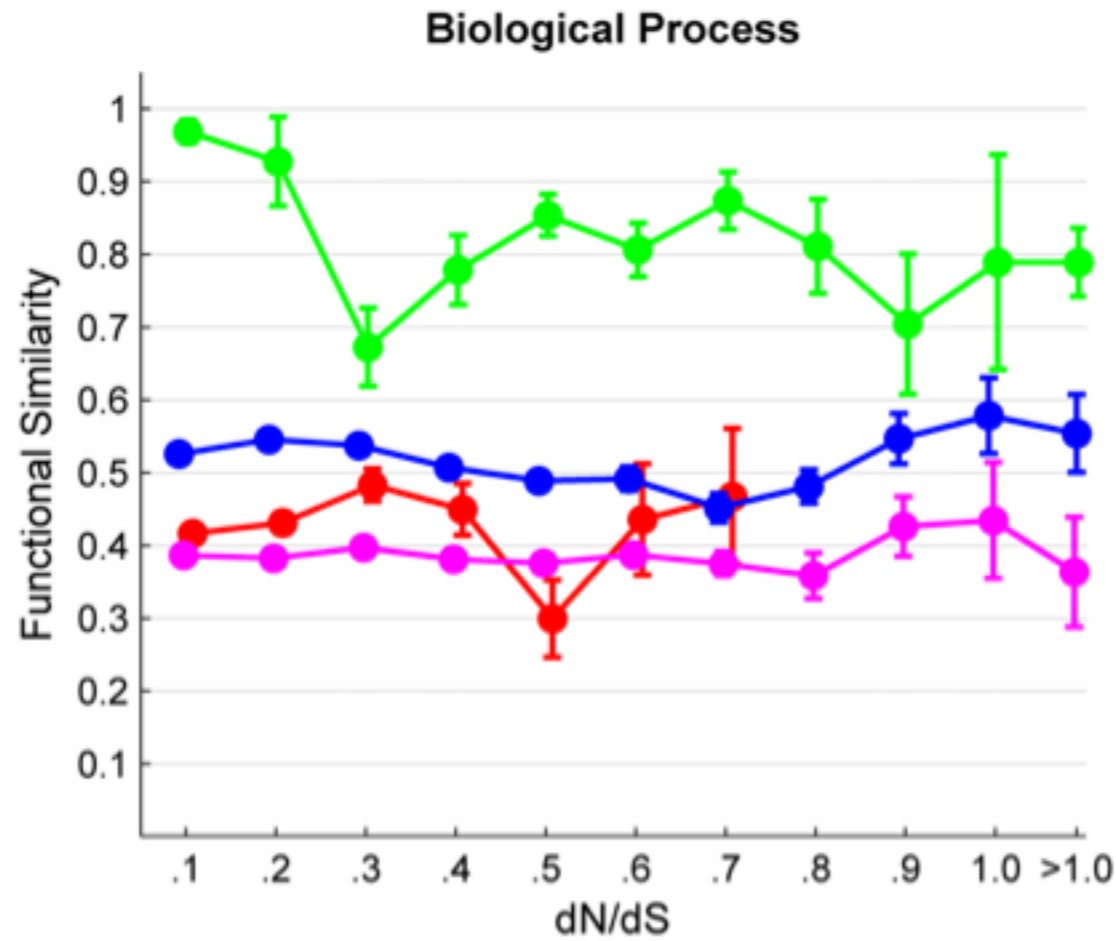

Ortho: (1804) Bins: (1075)(431)(167)(83)(27)(13)(8)(0)(0)(0)(0)  
 Inpara: (395) Bins: (27)(9)(27)(38)(66)(67)(51)(31)(21)(7)(51)  
 W-s outpara: (5817) Bins: (1784)(784)(887)(811)(637)(383)(243)(153)(72)(32)(31)  
 B-s outpara: (5013) Bins: (1561)(626)(744)(714)(606)(382)(220)(85)(45)(18)(12)

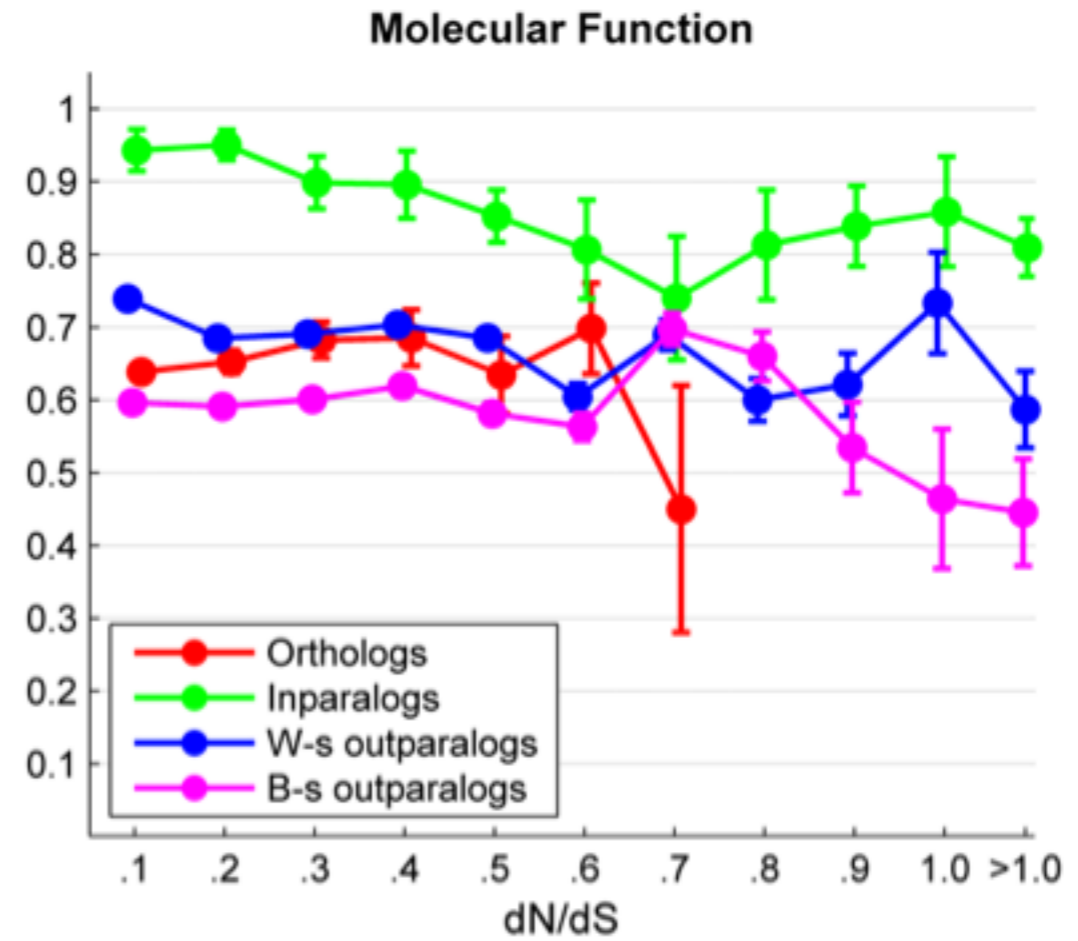

Ortho: (1767) Bins: (1096)(424)(137)(65)(27)(12)(6)(0)(0)(0)(0)  
 Inpara: (257) Bins: (39)(15)(29)(24)(38)(20)(21)(18)(8)(6)(39)  
 W-s outpara: (5681) Bins: (1922)(779)(801)(763)(574)(373)(220)(129)(64)(26)(30)  
 B-s outpara: (4675) Bins: (1465)(627)(693)(671)(528)(338)(213)(84)(34)(12)(10)
