# Supplementary material for: Testing the Ortholog Conjecture with Comparative Functional Genomic Data from Mammals
Source: PubMed Central journal article supplement (PMC3111532; doi:10.1371/journal.pcbi.1002073), 2011-06-09

Figure S3

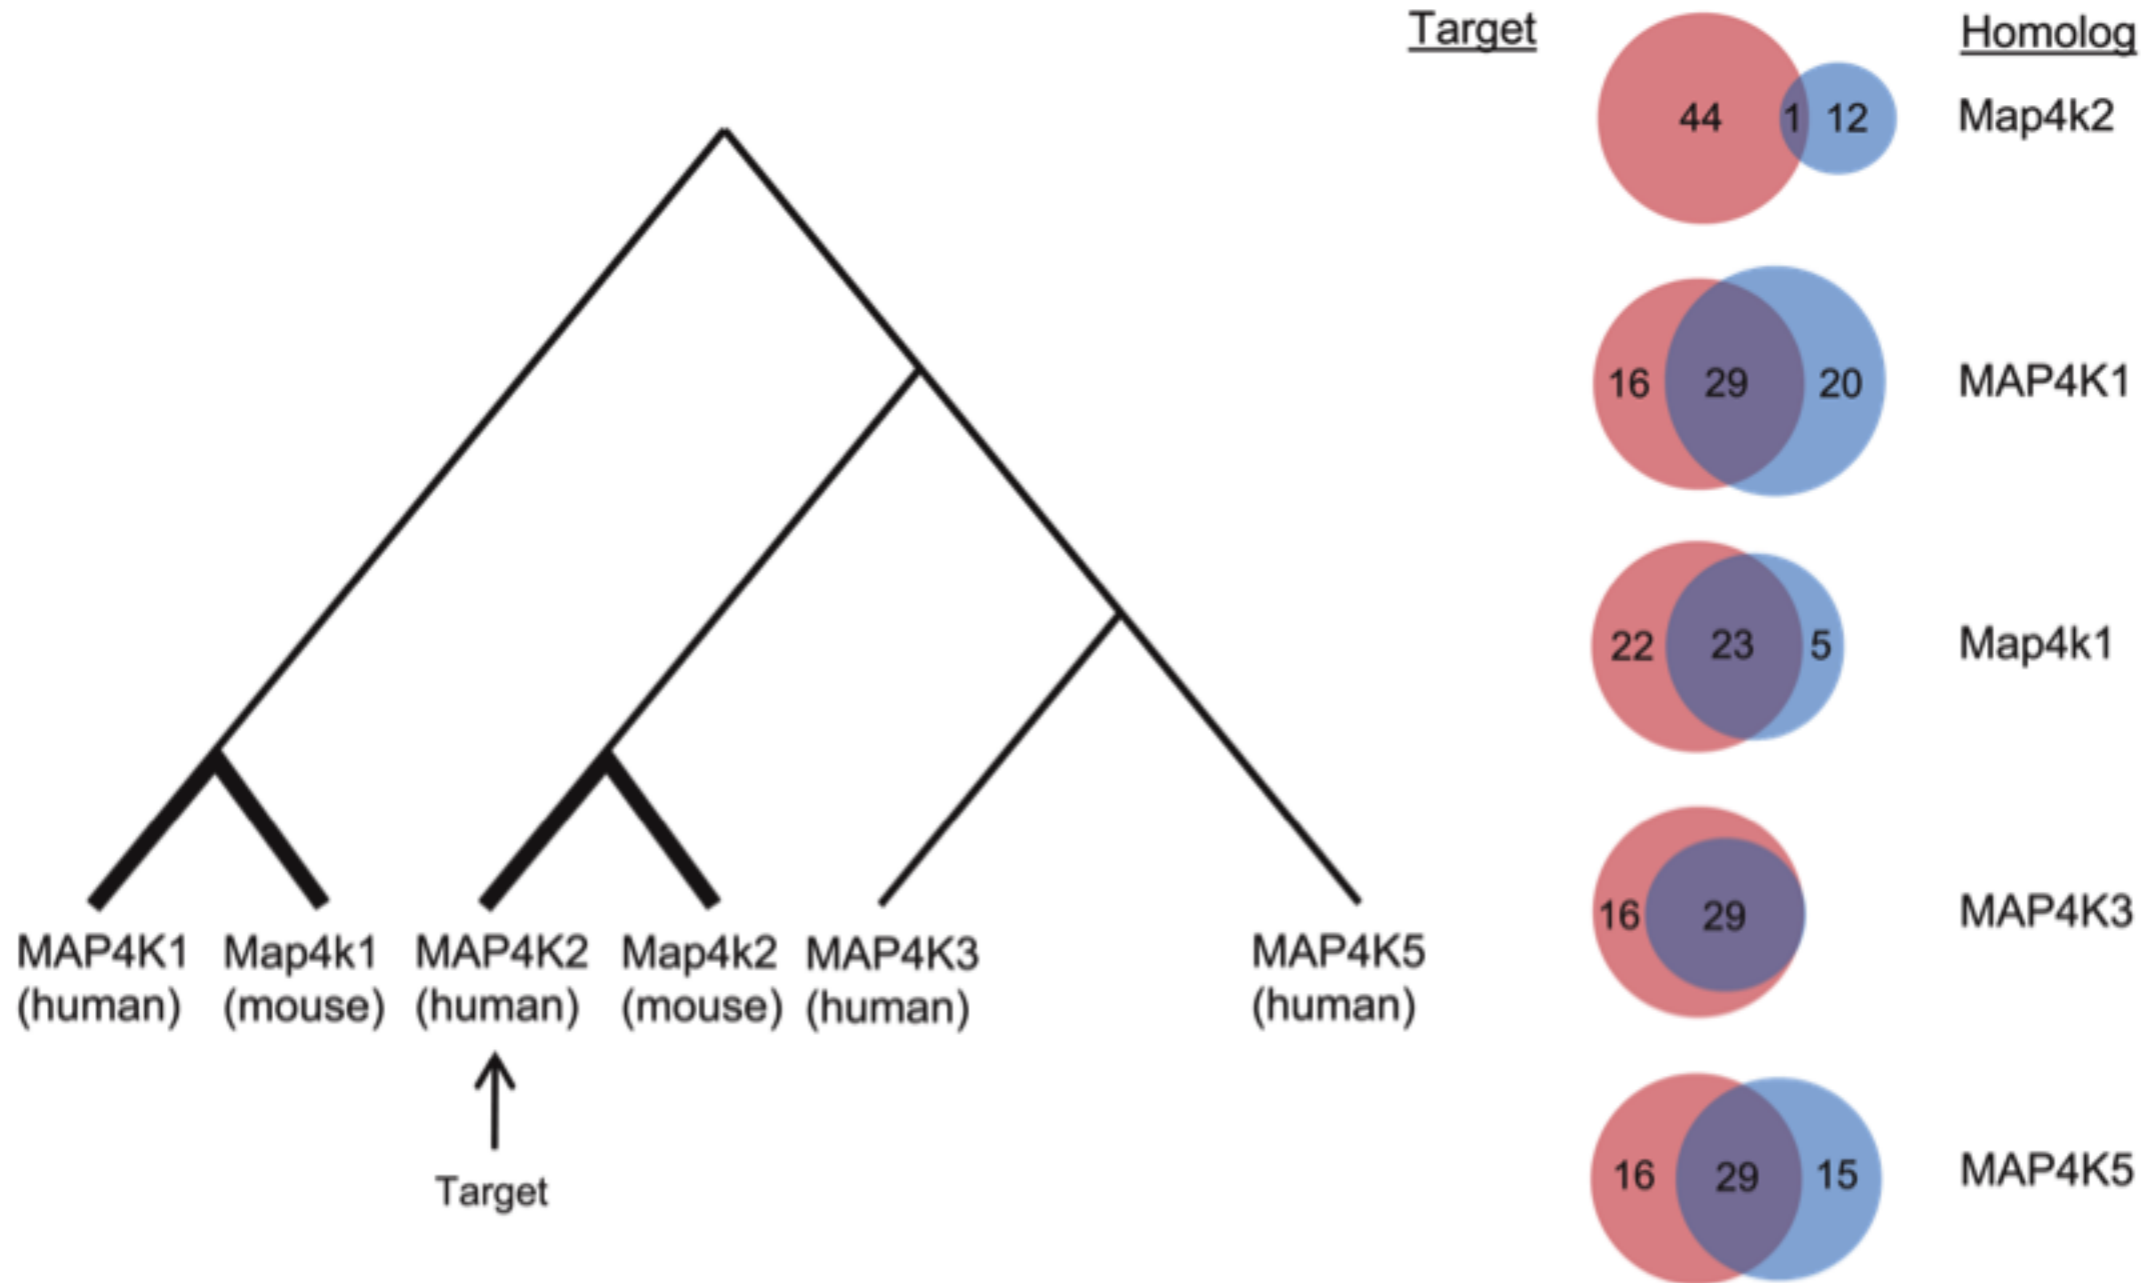

Supplement: pcbi.1002073.s003.pdf [file pcbi.1002073.s003.pdf]
