# Supplementary material for: Testing the Ortholog Conjecture with Comparative Functional Genomic Data from Mammals
Source: PubMed Central journal article supplement (PMC3111532; doi:10.1371/journal.pcbi.1002073), 2011-06-09
Supplement: pcbi.1002073.s004.pdf [file pcbi.1002073.s004.pdf]

Figure S4A

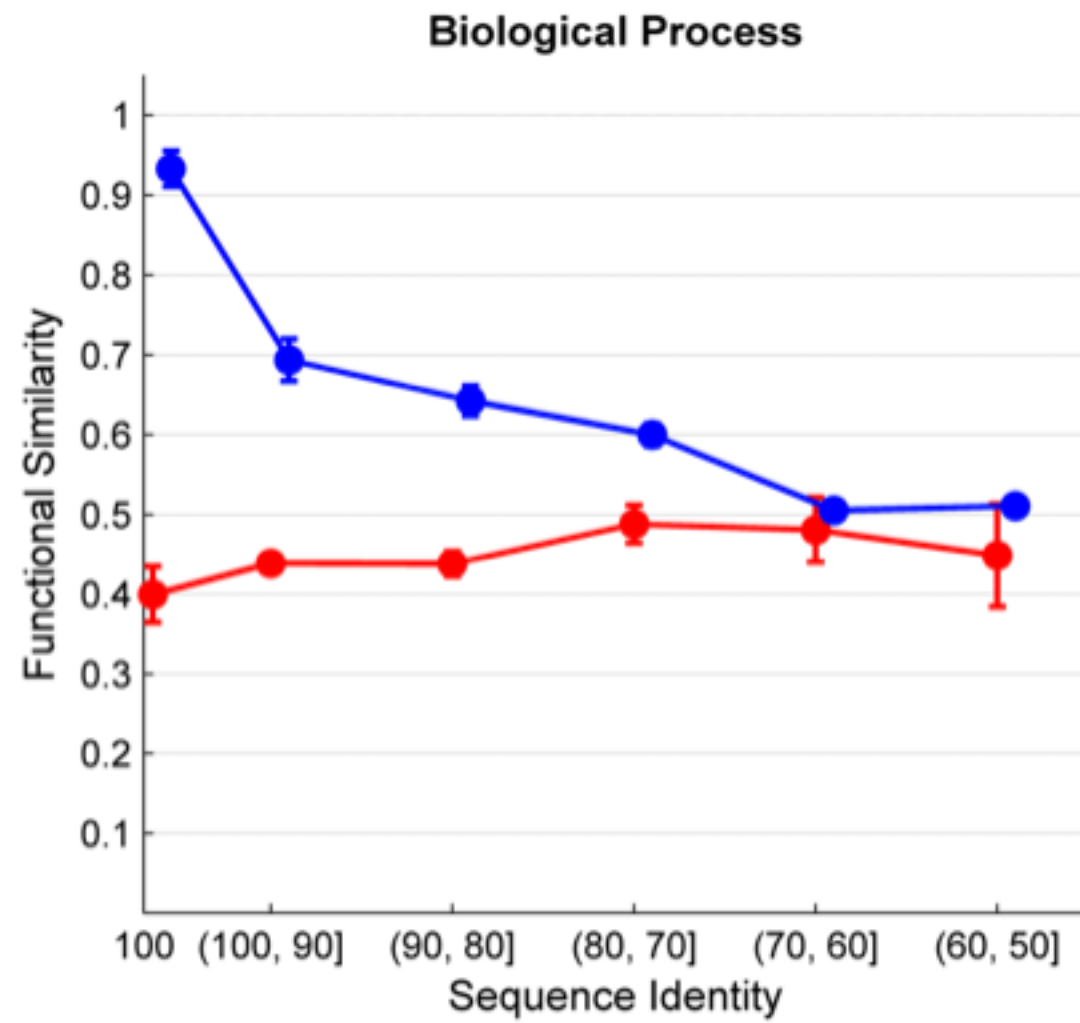

Orthologs: (1563) Bins: (73) (812) (411) (167) (77) (23)  
Paralogs: (3805) Bins: (94) (173) (322) (686) (925) (1605)

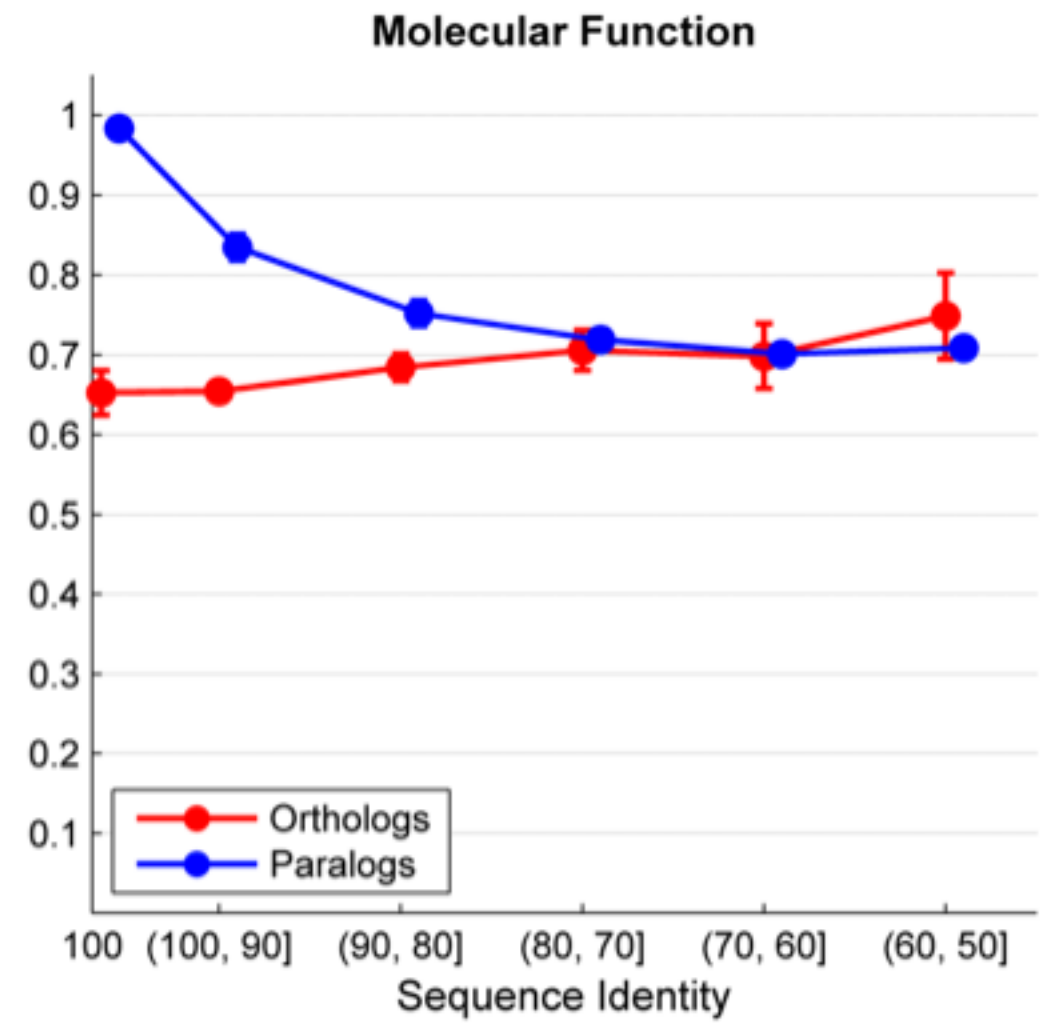

Orthologs: (1601) Bins: (104) (870) (387) (152) (63) (25)  
Paralogs: (4097) Bins: (281) (241) (385) (603) (1002) (1585)

Figure S4B

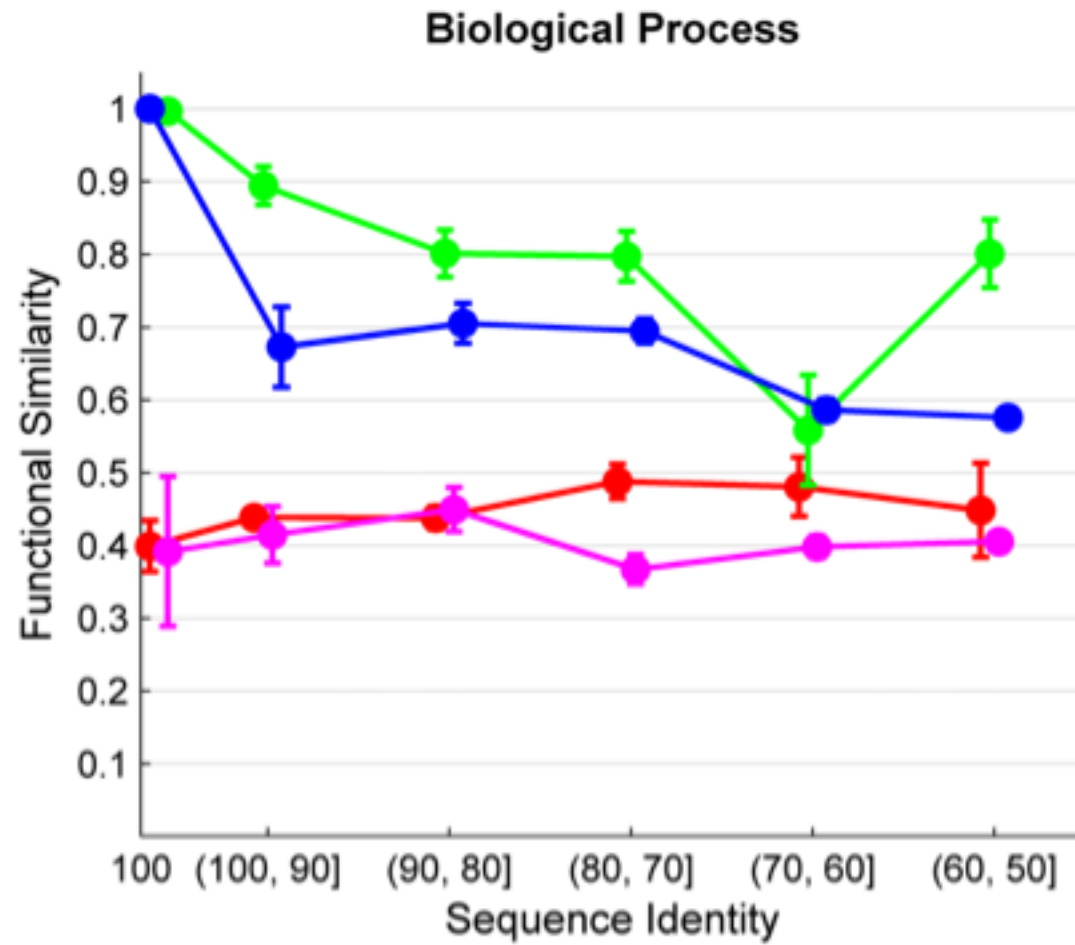

Orthologs: (1563) Bins: (73) (812) (411) (167) (77) (23)  
 Inparalogs: (400) Bins: (75) (78) (79) (82) (25) (61)  
 W-s outparalogs: (1915) Bins: (9) (42) (134) (379) (503) (848)  
 B-s outparalogs: (1490) Bins: (10) (53) (109) (225) (397) (696)

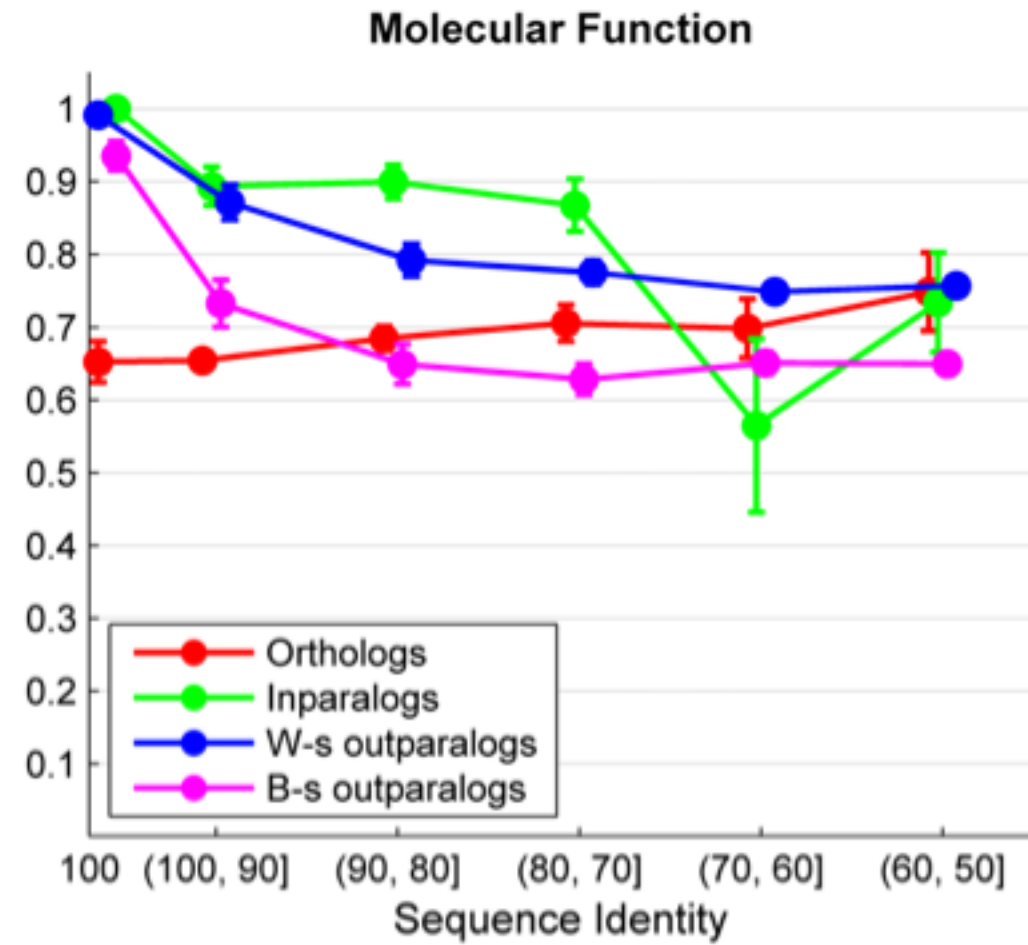

Orthologs: (1601) Bins: (104) (870) (387) (152) (63) (25)  
 Inparalogs: (268) Bins: (77) (62) (65) (35) (15) (14)  
 W-s outparalogs: (2123) Bins: (151) (105) (163) (315) (530) (859)  
 B-s outparalogs: (1706) Bins: (53) (74) (157) (253) (457) (712)
