# Supplementary material for: Testing the Ortholog Conjecture with Comparative Functional Genomic Data from Mammals
Source: PubMed Central journal article supplement (PMC3111532; doi:10.1371/journal.pcbi.1002073), 2011-06-09
Supplement: pcbi.1002073.s005.pdf [file pcbi.1002073.s005.pdf]

Figure S5A

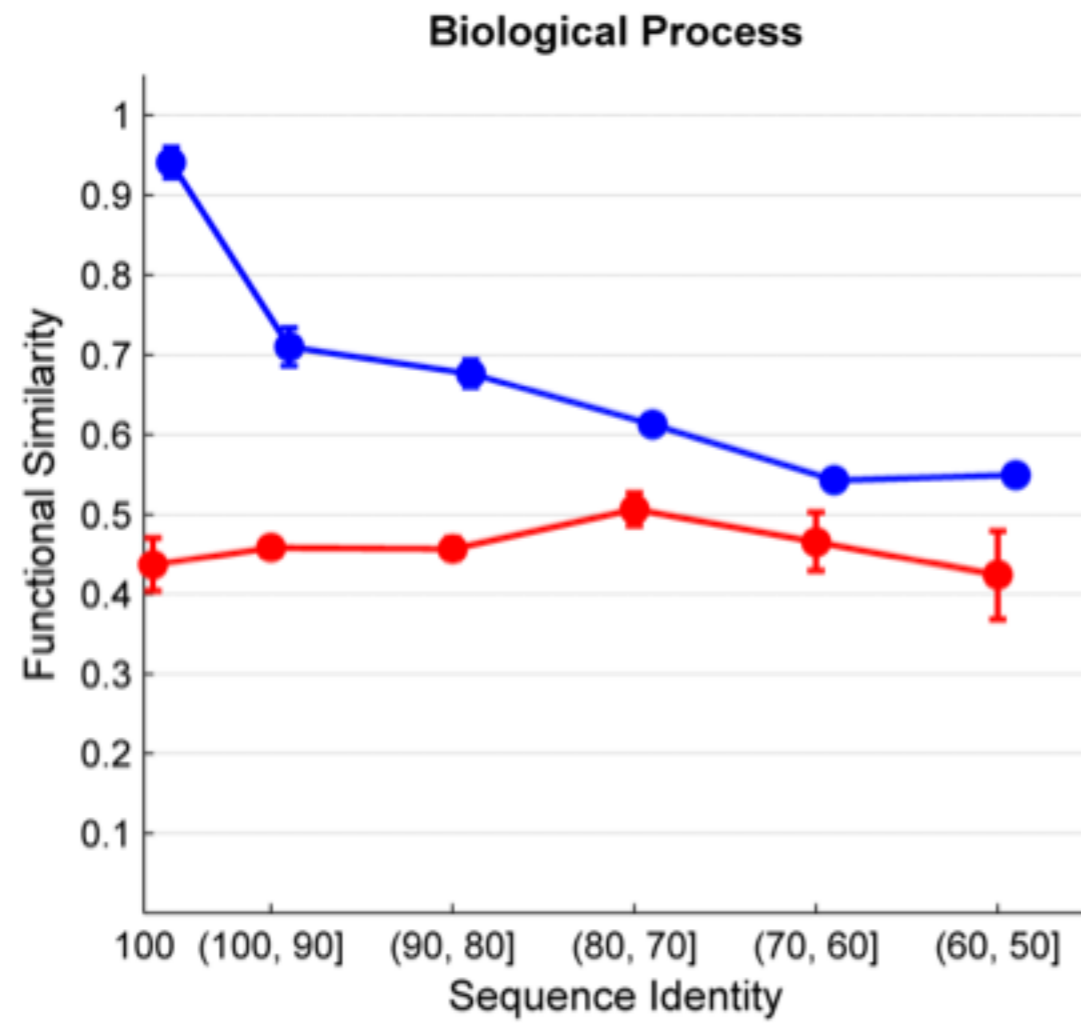

Orthologs: (1796) Bins: (79) (919) (476) (203) (89) (30)  
Paralogs: (4202) Bins: (98) (184) (342) (755) (1016) (1807)

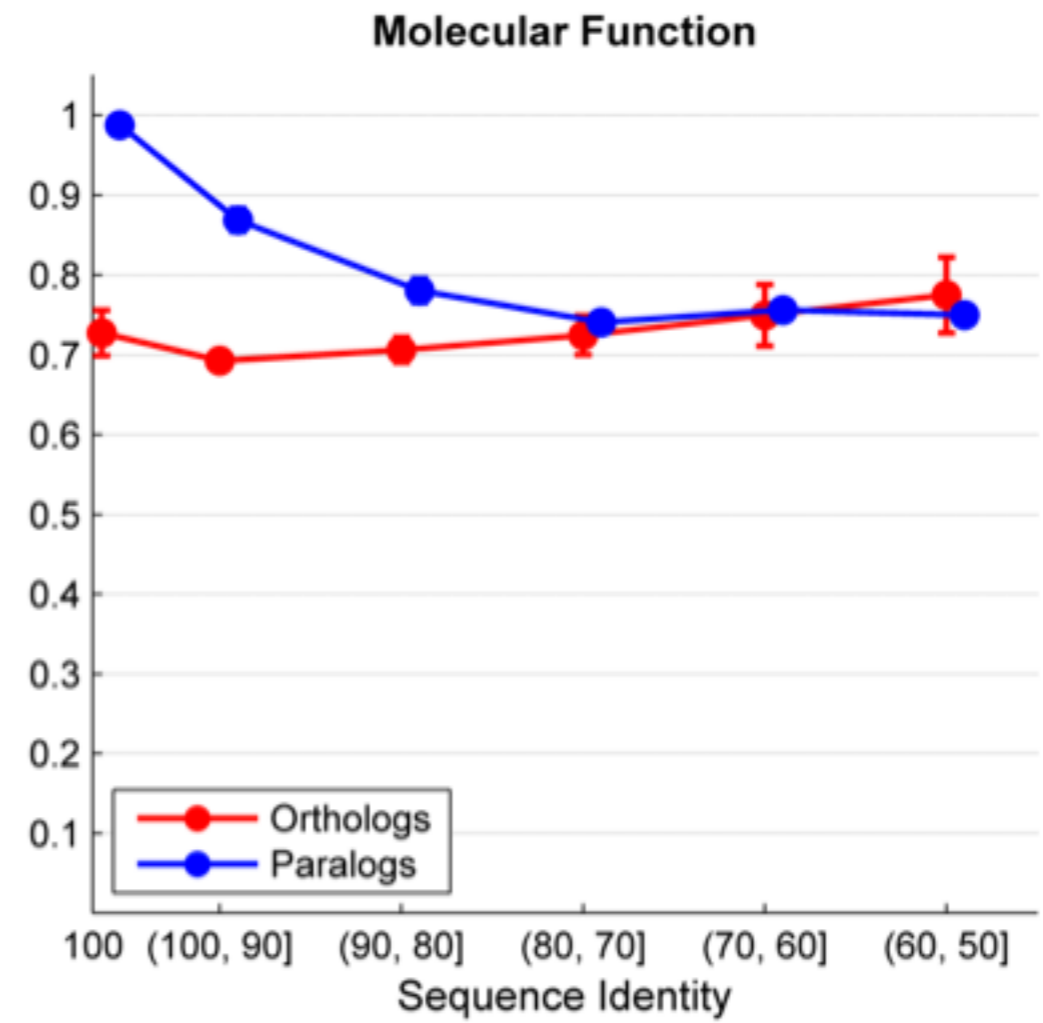

Orthologs: (1761) Bins: (105) (949) (433) (176) (70) (28)  
Paralogs: (4568) Bins: (295) (261) (414) (683) (1120) (1795)

Figure S5B

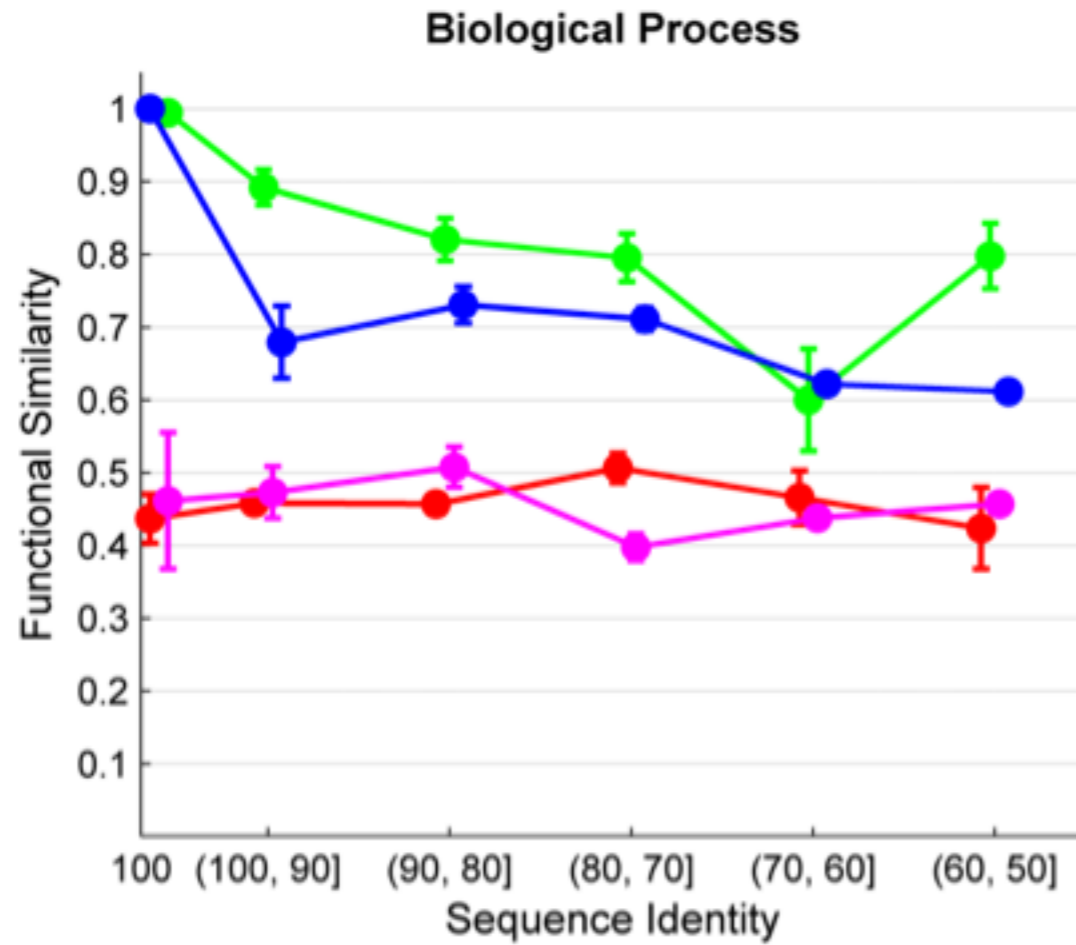

Orthologs: (1796) Bins: (79) (919) (476) (203) (89) (30)  
 Inparalogs: (418) Bins: (79) (82) (81) (87) (25) (64)  
 W-s outparalogs: (2103) Bins: (9) (45) (145) (407) (558) (939)  
 B-s outparalogs: (1681) Bins: (10) (57) (116) (261) (433) (804)

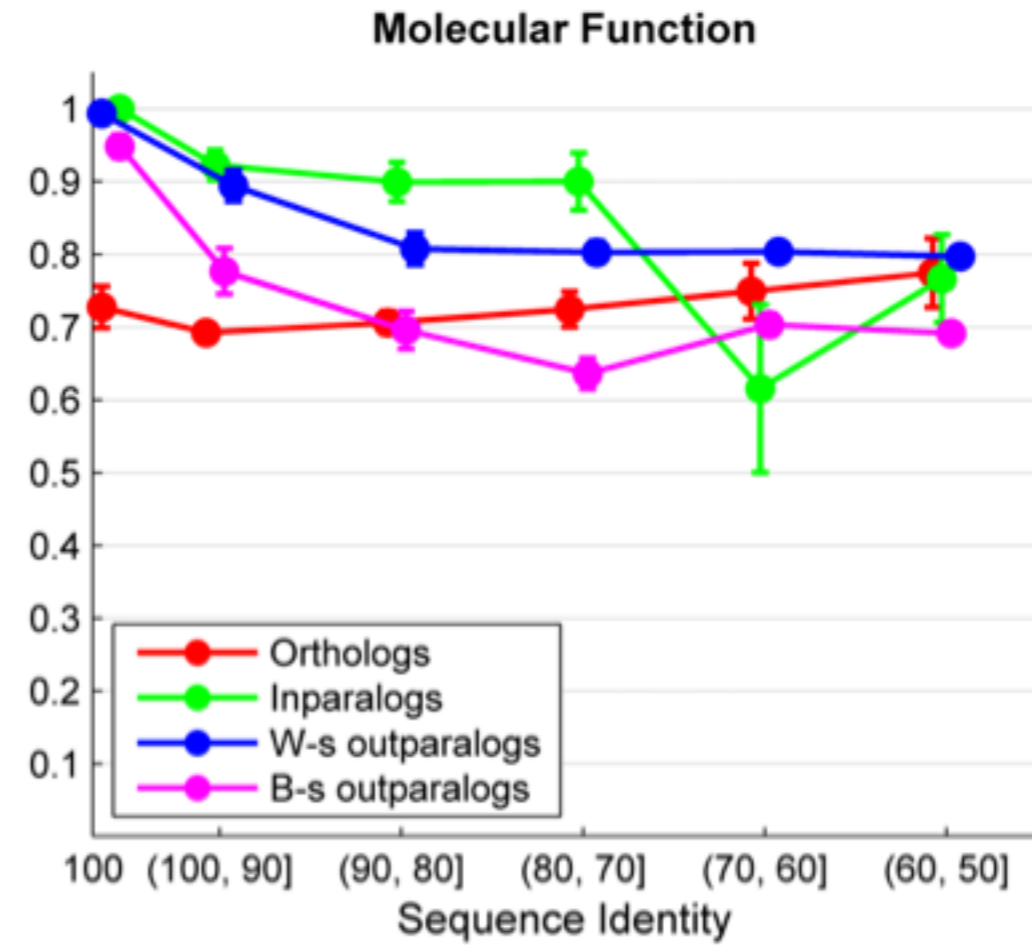

Orthologs: (1761) Bins: (105) (949) (433) (176) (70) (28)  
 Inparalogs: (313) Bins: (91) (76) (76) (39) (16) (15)  
 W-s outparalogs: (2383) Bins: (151) (109) (174) (367) (604) (978)  
 B-s outparalogs: (1872) Bins: (53) (76) (164) (277) (500) (802)
