# Supplementary material for: Testing the Ortholog Conjecture with Comparative Functional Genomic Data from Mammals
Source: PubMed Central journal article supplement (PMC3111532; doi:10.1371/journal.pcbi.1002073), 2011-06-09
Supplement: pcbi.1002073.s006.pdf [file pcbi.1002073.s006.pdf]

Figure S6A

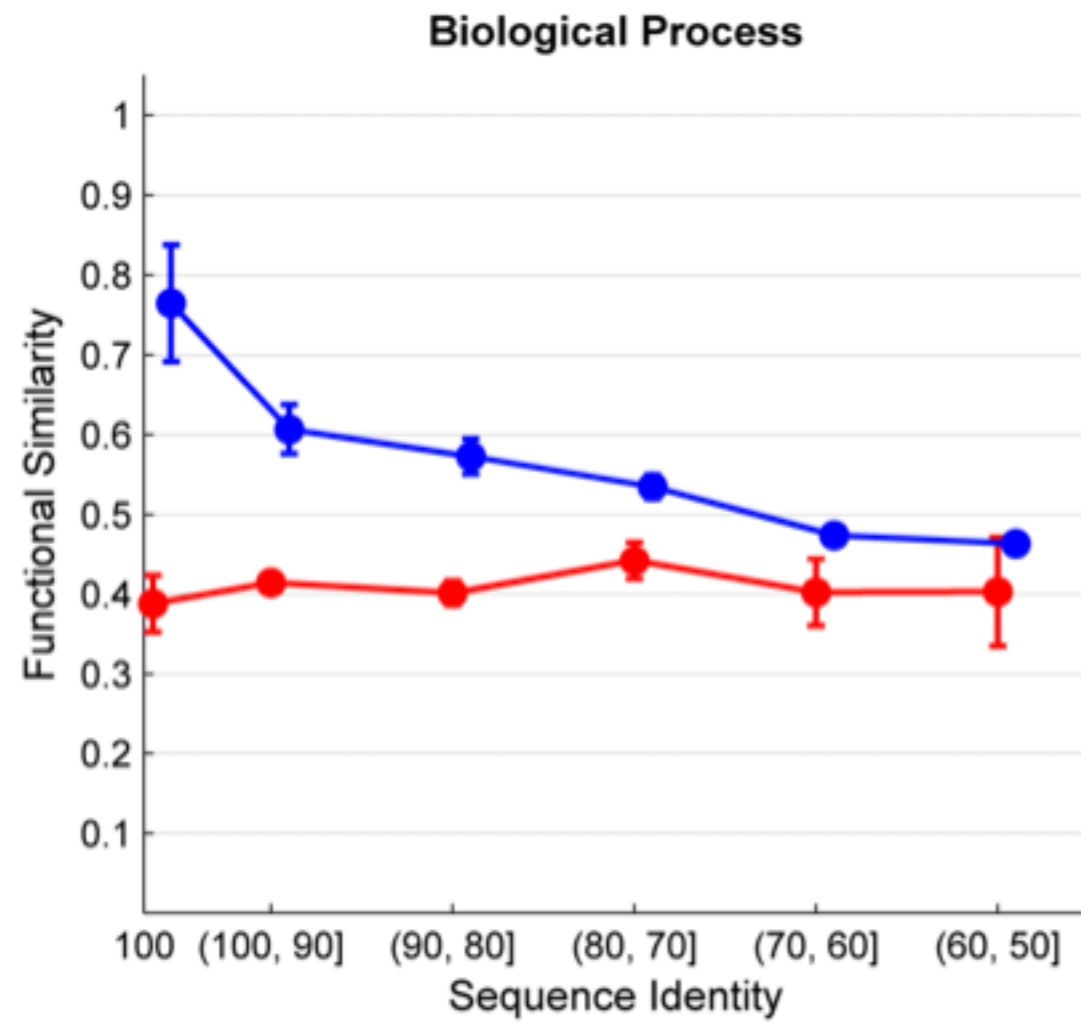

Orthologs: (1403) Bins: (65) (736) (373) (145) (62) (22)  
Paralogs: (3059) Bins: (24) (119) (224) (543) (755) (1394)

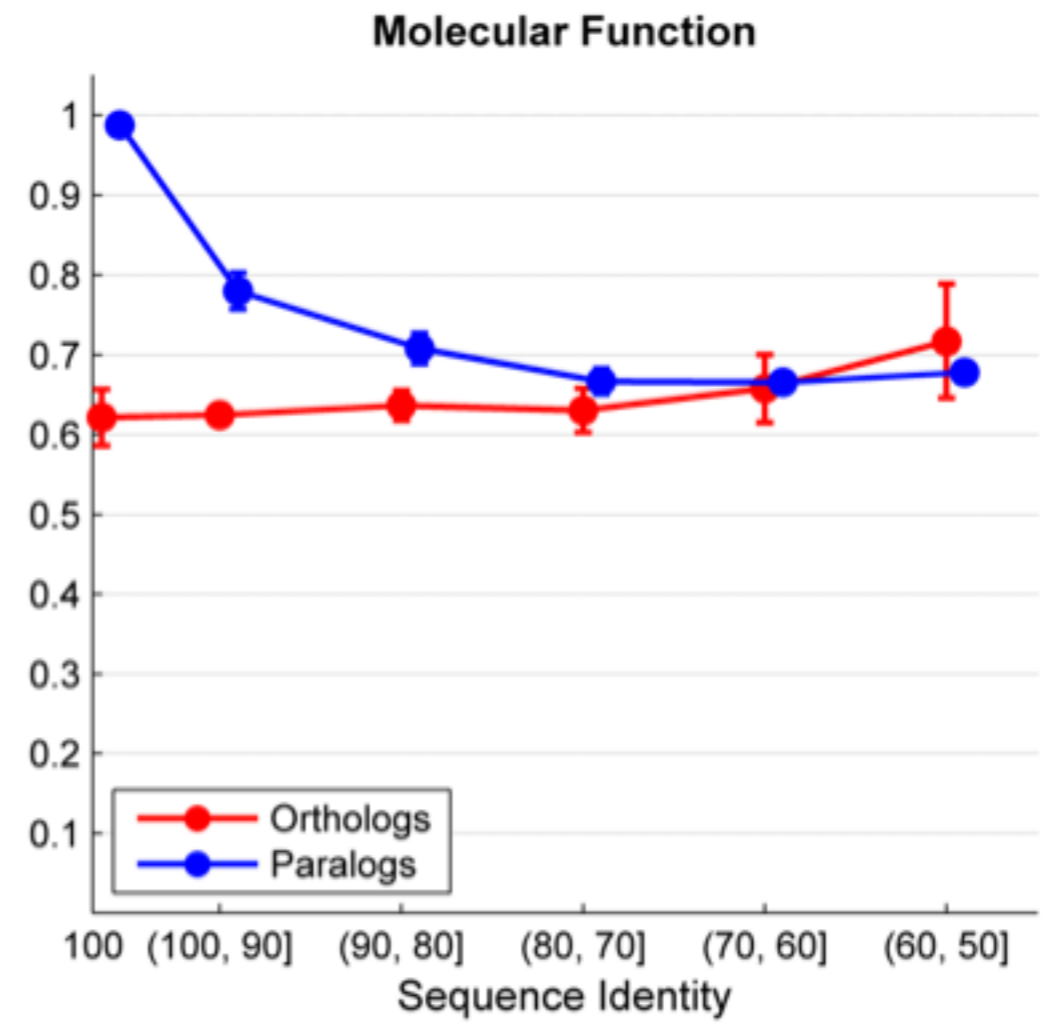

Orthologs: (1316) Bins: (72) (725) (316) (132) (54) (17)  
Paralogs: (3183) Bins: (143) (161) (300) (448) (817) (1314)

Figure S6B

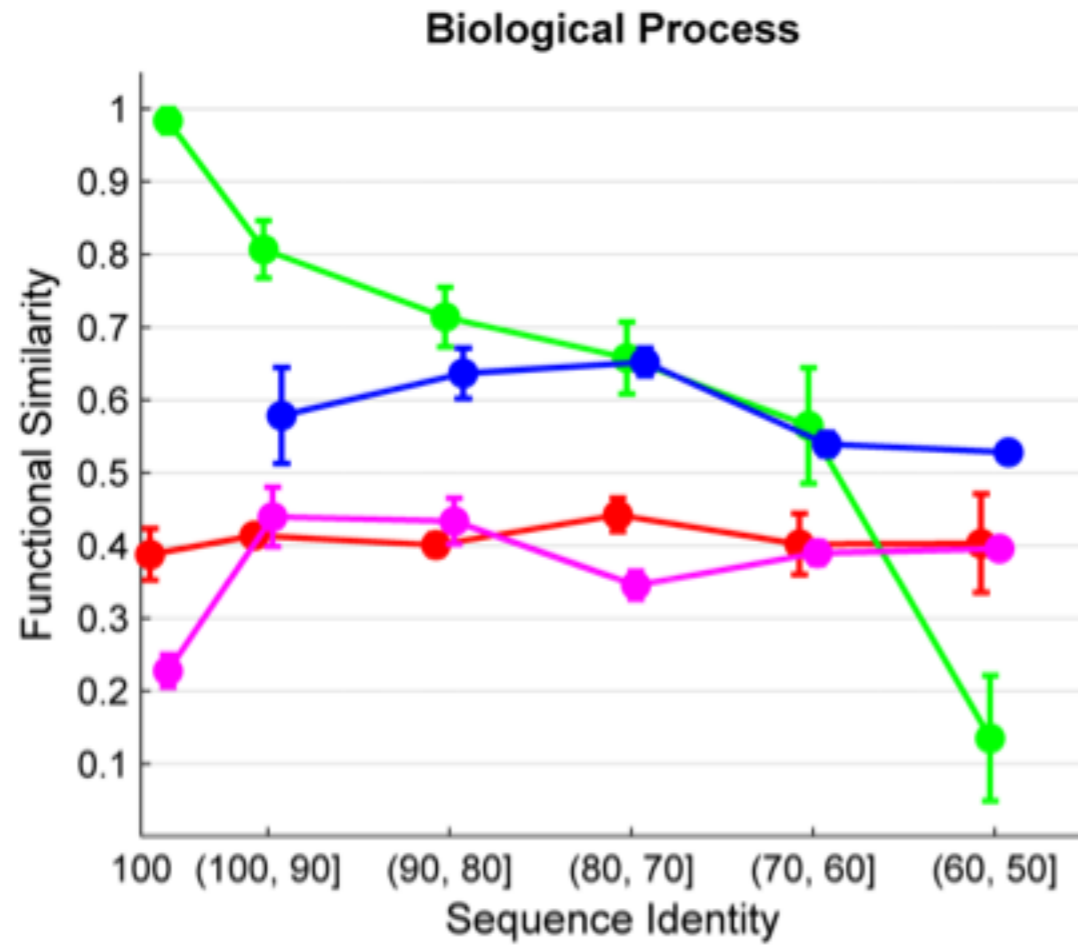

Orthologs: (1403) Bins: (65) (736) (373) (145) (62) (22)  
 Inparalogs: (157) Bins: (15) (42) (43) (28) (19) (10)  
 W-s outparalogs: (1569) Bins: (0) (32) (94) (307) (403) (733)  
 B-s outparalogs: (1331) Bins: (7) (45) (87) (208) (333) (651)

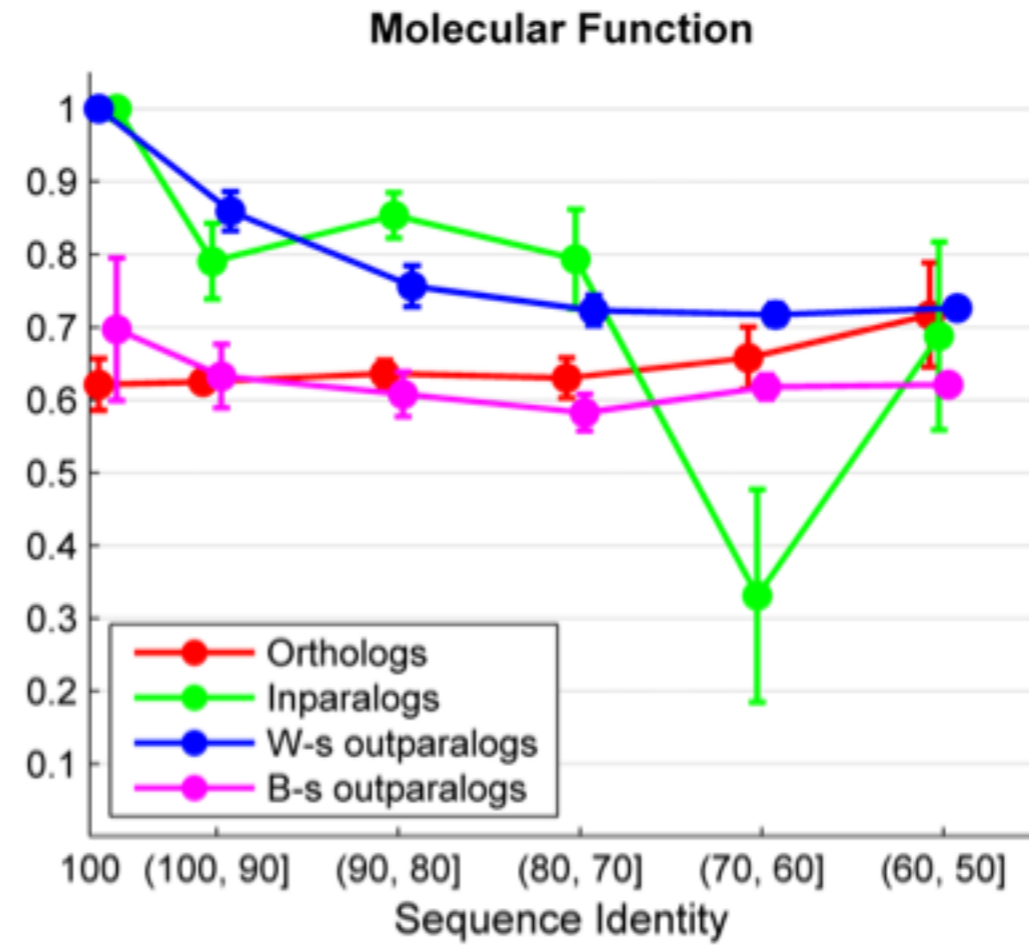

Orthologs: (1316) Bins: (72) (725) (316) (132) (54) (17)  
 Inparalogs: (125) Bins: (13) (28) (48) (21) (8) (7)  
 W-s outparalogs: (1688) Bins: (124) (85) (123) (237) (415) (704)  
 B-s outparalogs: (1370) Bins: (6) (48) (129) (190) (394) (603)

Figure S6C

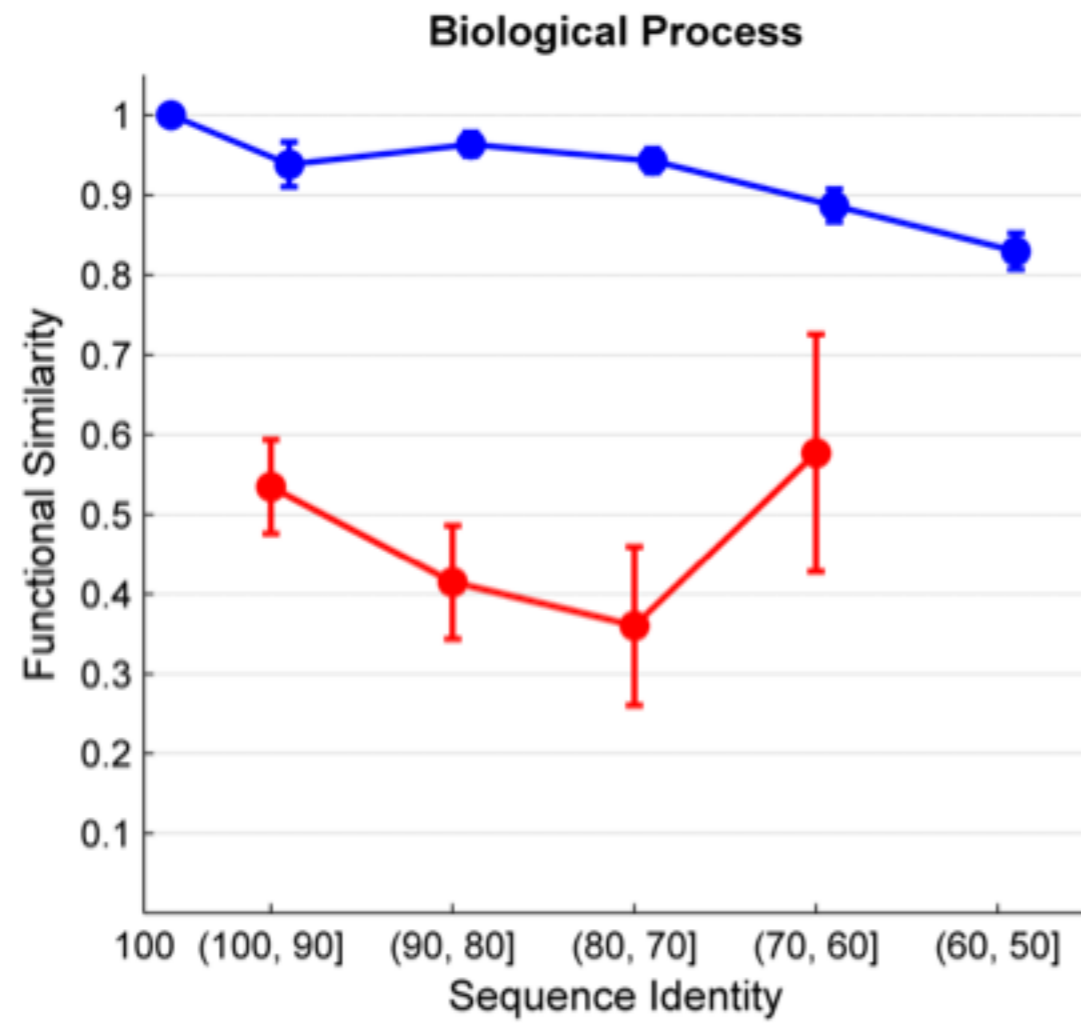

Orthologs: (91) Bins: (0) (42) (29) (12) (8) (0)  
 Paralogs: (768) Bins: (64) (45) (87) (201) (148) (223)

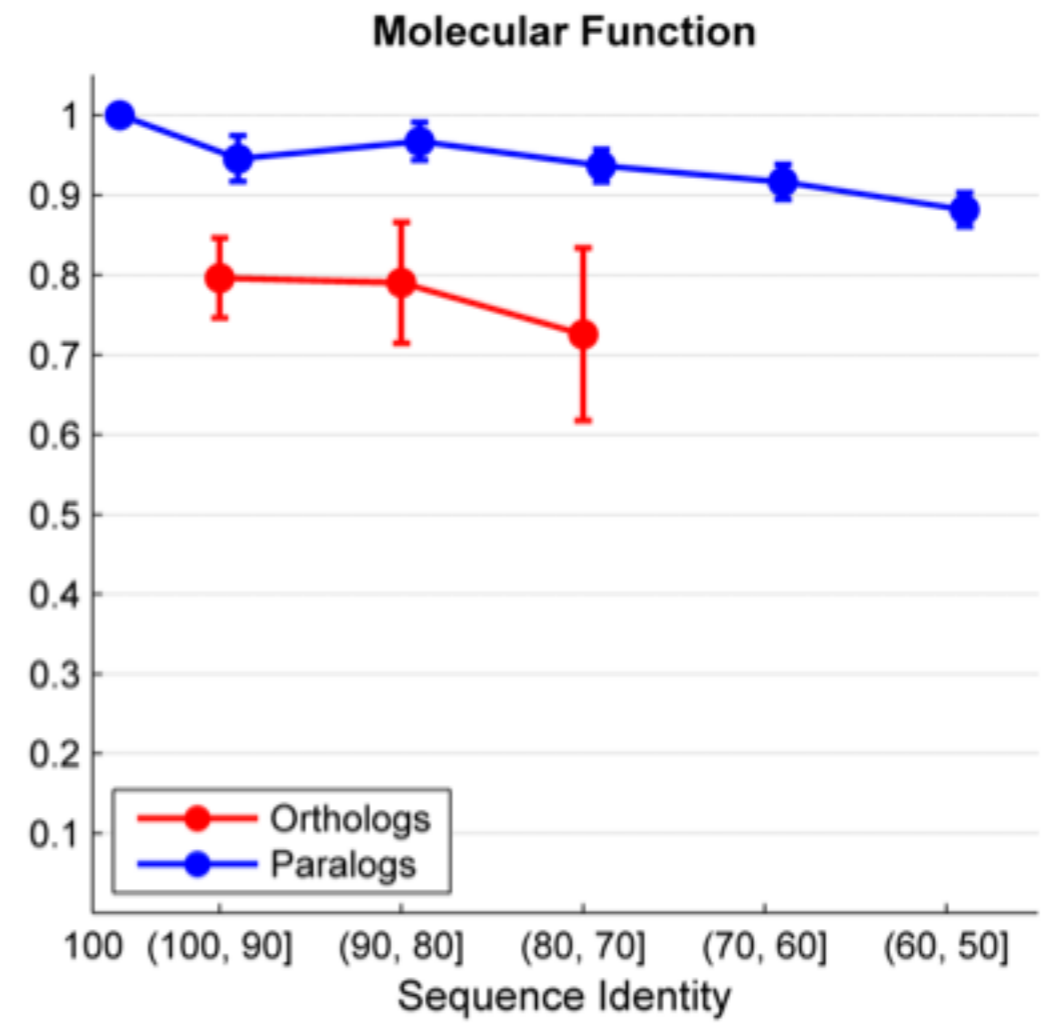

Orthologs: (67) Bins: (0) (38) (19) (10) (0) (0)  
 Paralogs: (649) Bins: (152) (49) (50) (99) (119) (180)

Figure S6D

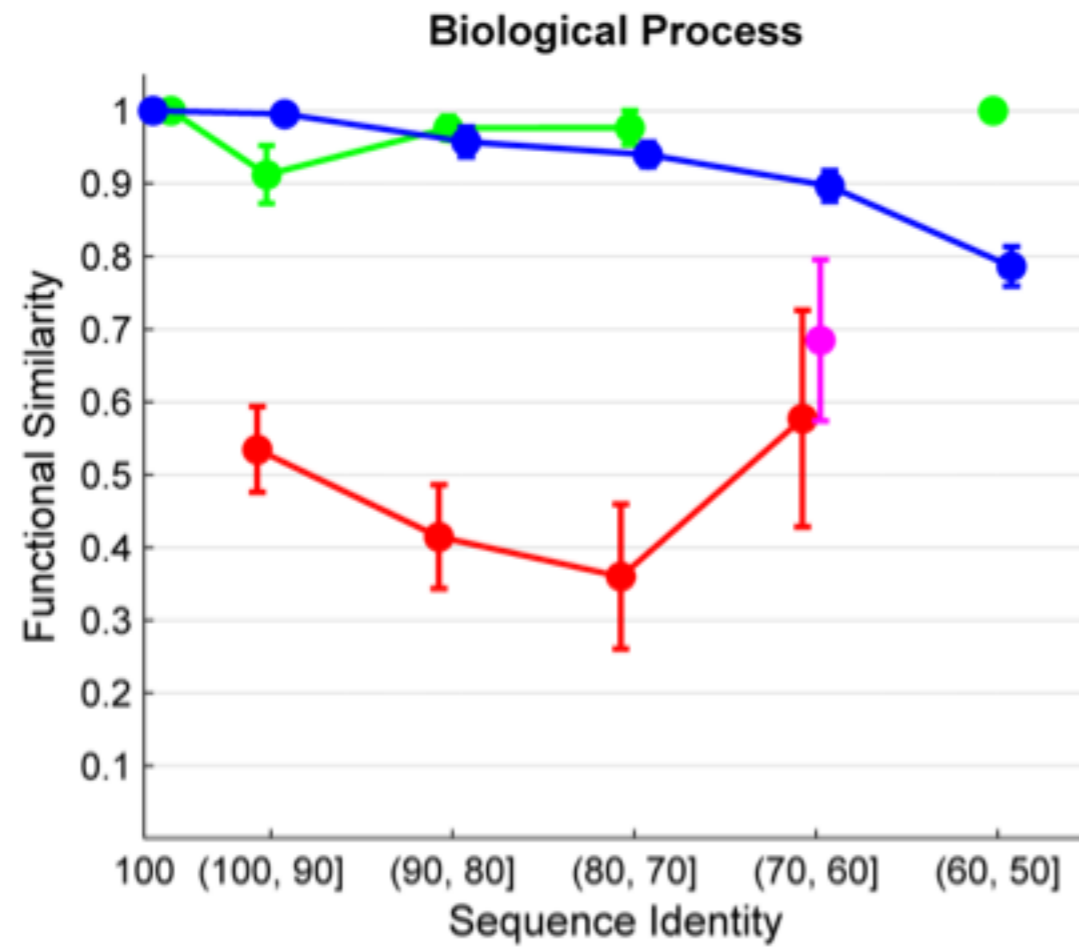

Orthologs: (91) Bins: (0) (42) (29) (12) (8) (0)  
 Inparalogs: (178) Bins: (55) (31) (28) (21) (0) (43)  
 W-s outparalogs: (576) Bins: (9) (13) (59) (177) (140) (178)  
 B-s outparalogs: (5) Bins: (0) (0) (0) (0) (5) (0)

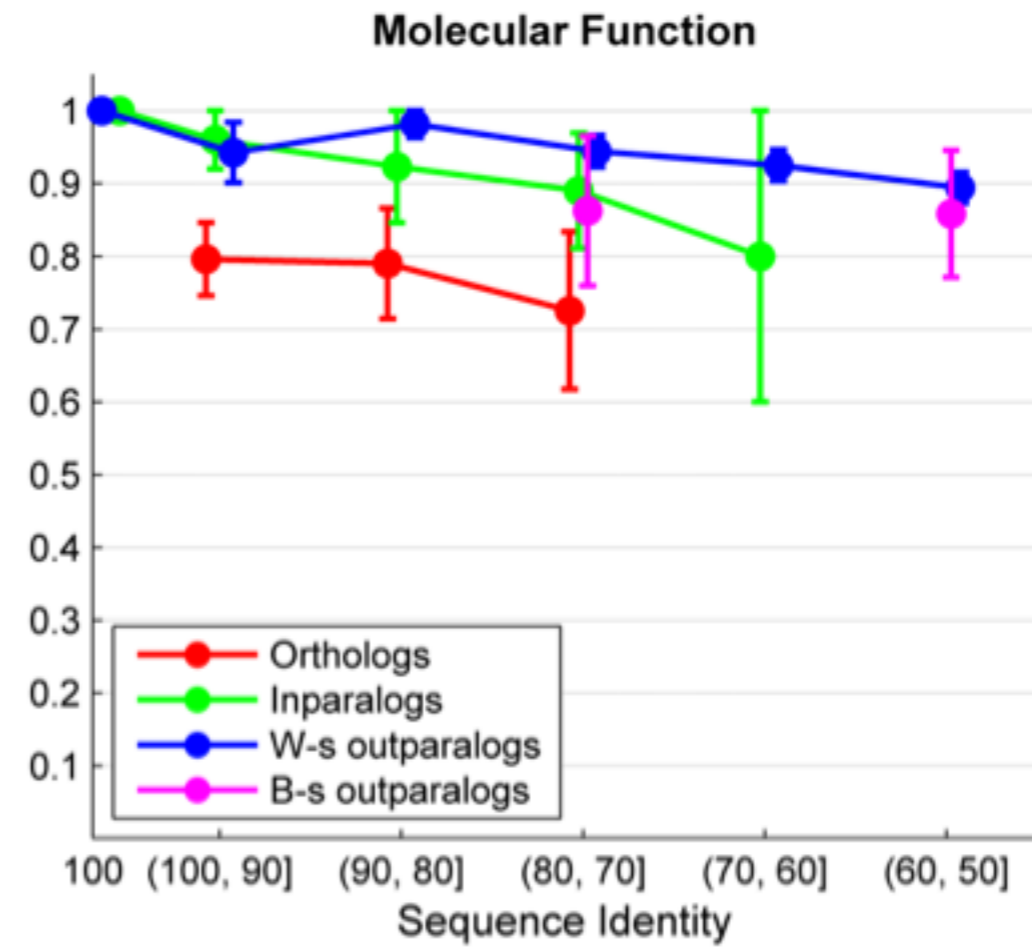

Orthologs: (67) Bins: (0) (38) (19) (10) (0) (0)  
 Inparalogs: (103) Bins: (55) (25) (13) (5) (5) (0)  
 W-s outparalogs: (525) Bins: (97) (23) (35) (88) (112) (170)  
 B-s outparalogs: (13) Bins: (0) (0) (0) (6) (0) (7)
