# Supplementary material for: Testing the Ortholog Conjecture with Comparative Functional Genomic Data from Mammals
Source: PubMed Central journal article supplement (PMC3111532; doi:10.1371/journal.pcbi.1002073), 2011-06-09
Supplement: pcbi.1002073.s007.pdf [file pcbi.1002073.s007.pdf]

Figure S7A

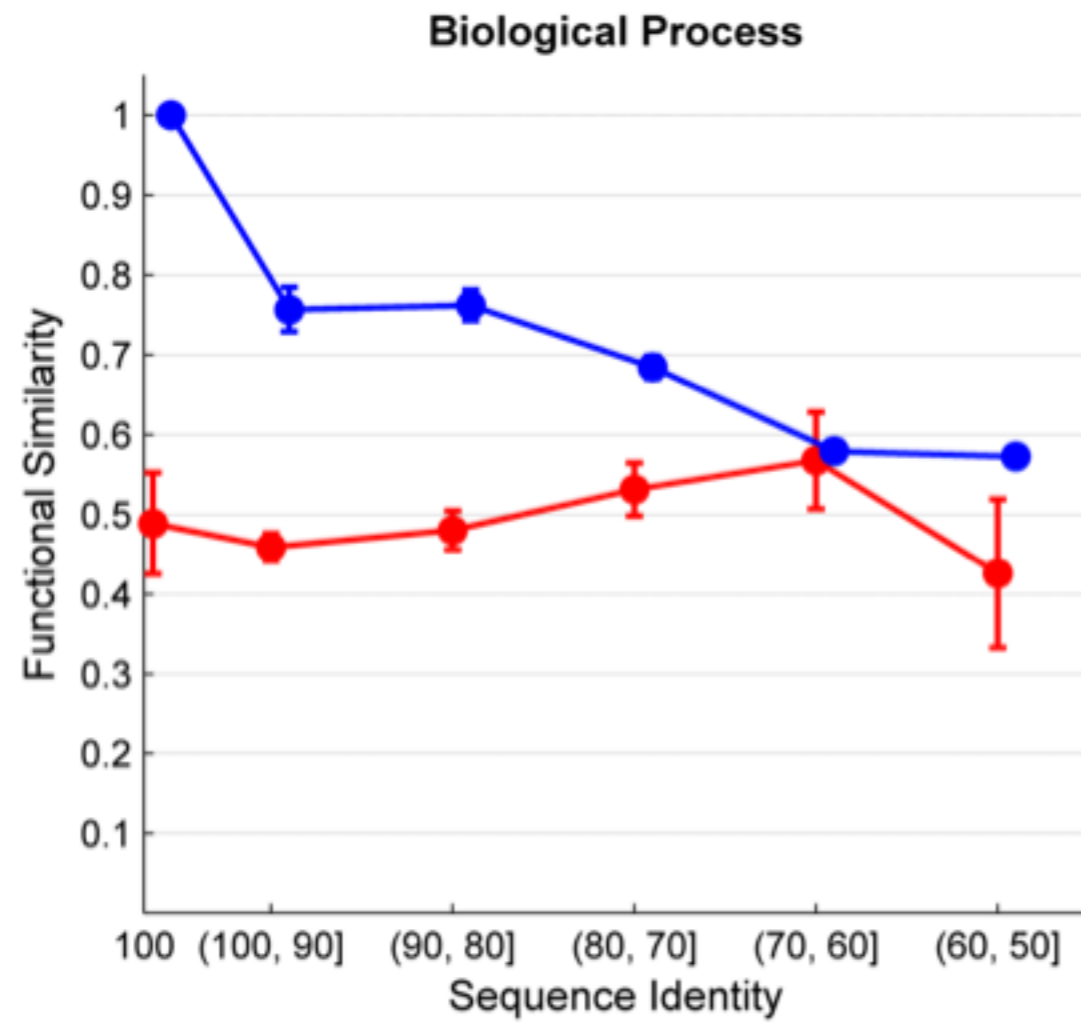

Orthologs: (704) Bins: (27) (362) (177) (87) (34) (17)  
Paralogs: (3030) Bins: (98) (153) (261) (573) (741) (1204)

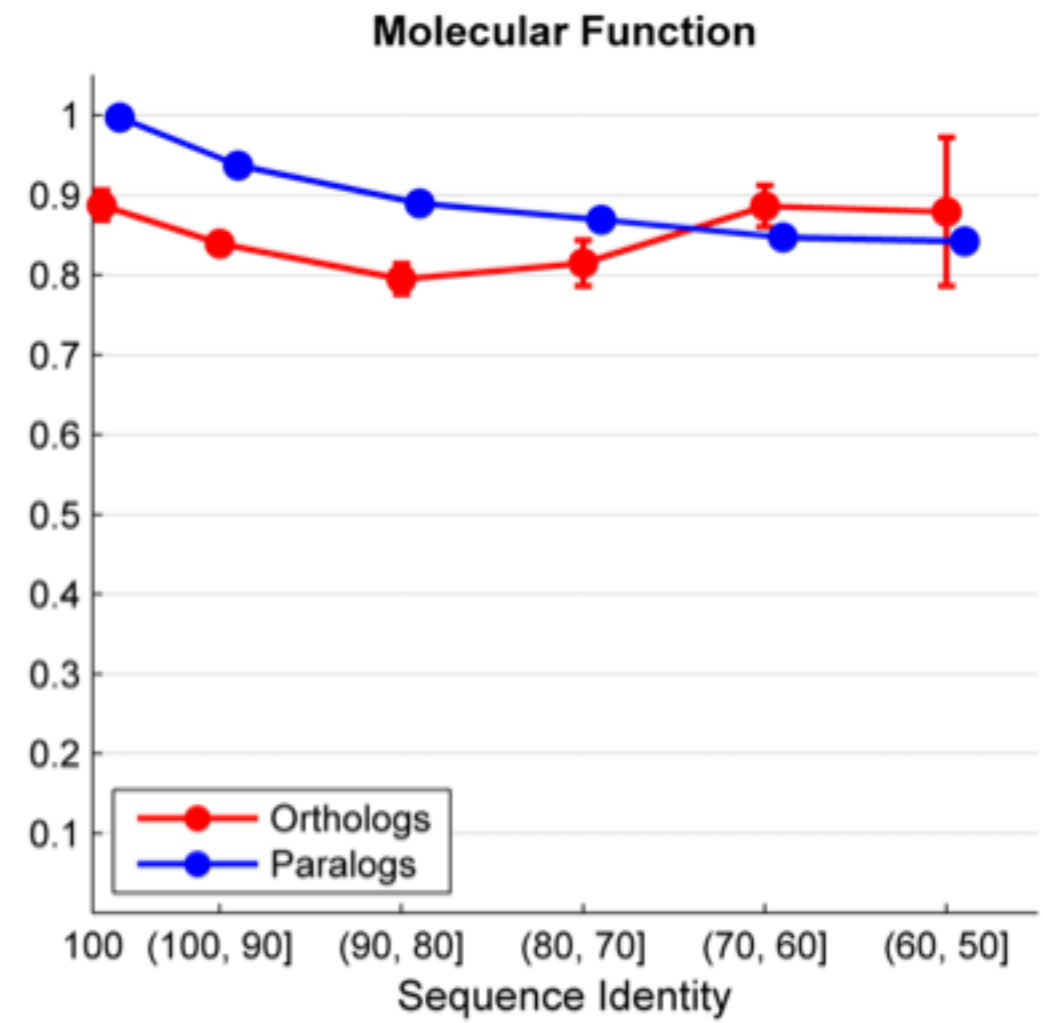

Orthologs: (1016) Bins: (76) (560) (236) (90) (43) (11)  
Paralogs: (3625) Bins: (384) (231) (345) (543) (854) (1268)

Figure S7B

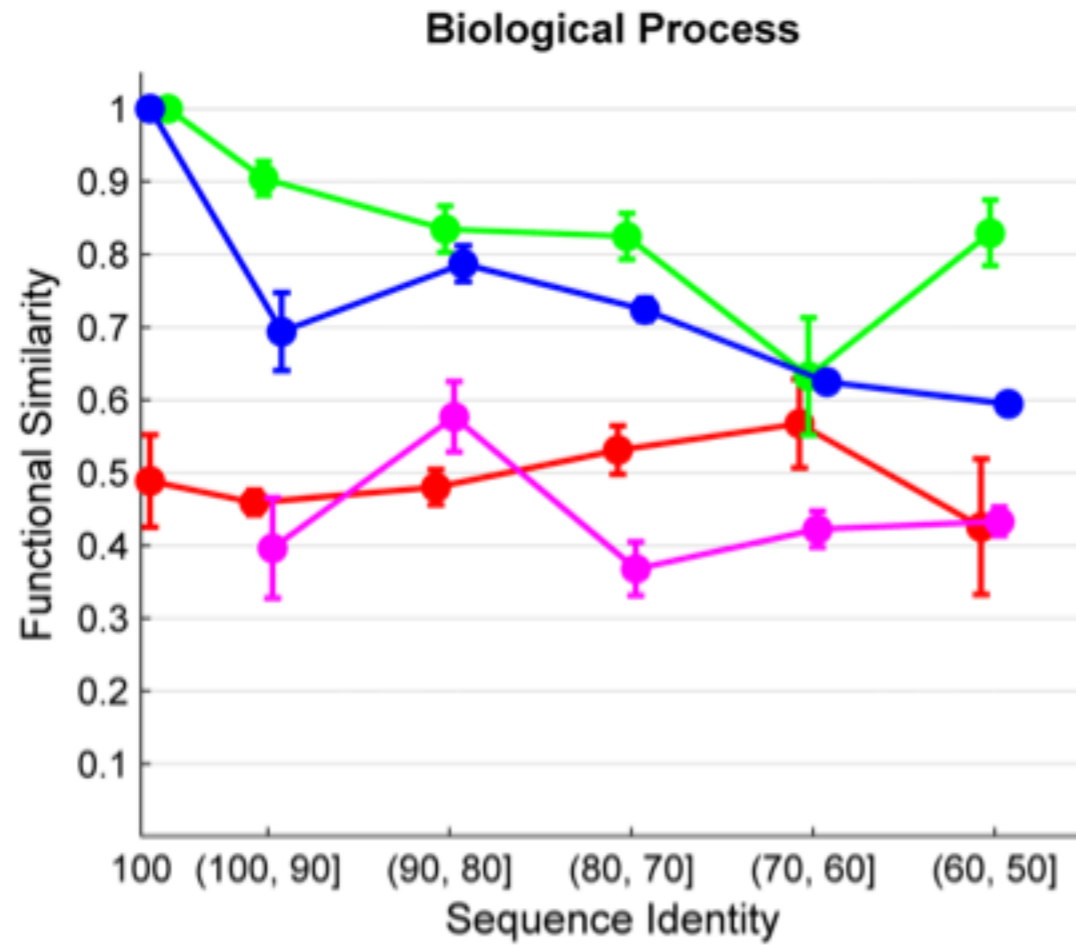

Orthologs: (704) Bins: (27) (362) (177) (87) (34) (17)  
 Inparalogs: (399) Bins: (86) (81) (74) (77) (21) (60)  
 W-s outparalogs: (2052) Bins: (10) (47) (139) (410) (552) (894)  
 B-s outparalogs: (577) Bins: (0) (25) (48) (86) (168) (250)

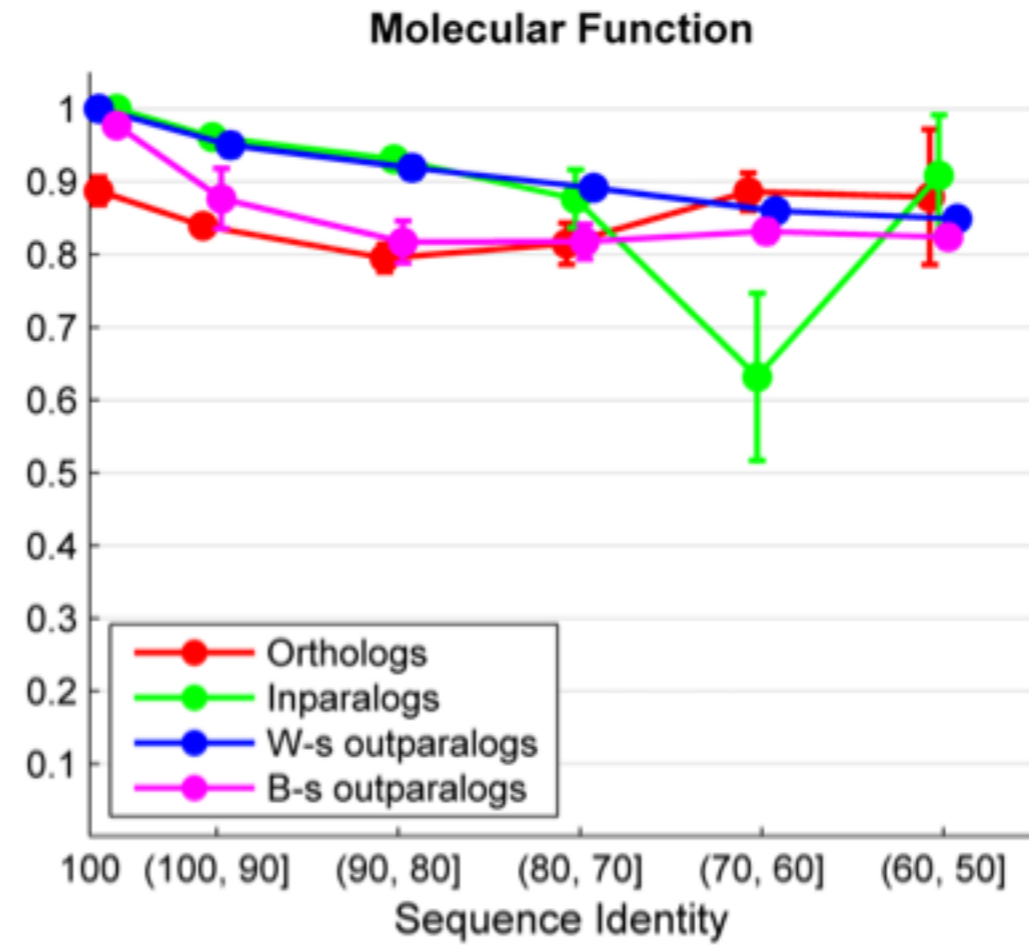

Orthologs: (1016) Bins: (76) (560) (236) (90) (43) (11)  
 Inparalogs: (311) Bins: (102) (75) (71) (36) (15) (12)  
 W-s outparalogs: (2286) Bins: (231) (104) (166) (350) (565) (870)  
 B-s outparalogs: (1028) Bins: (51) (52) (108) (157) (274) (386)

Figure S7C

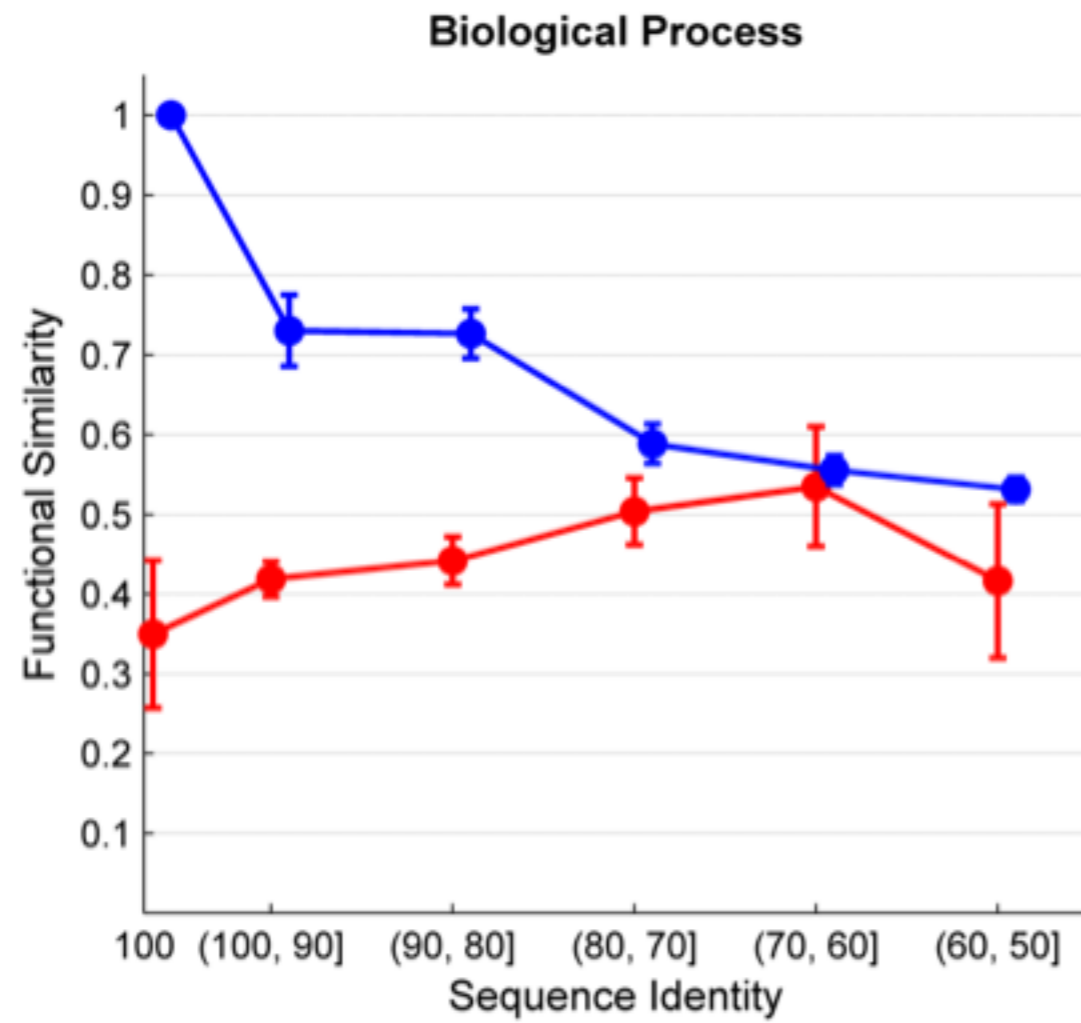

Orthologs: (414) Bins: (12) (198) (114) (55) (20) (15)  
Paralogs: (1273) Bins: (53) (70) (105) (217) (337) (491)

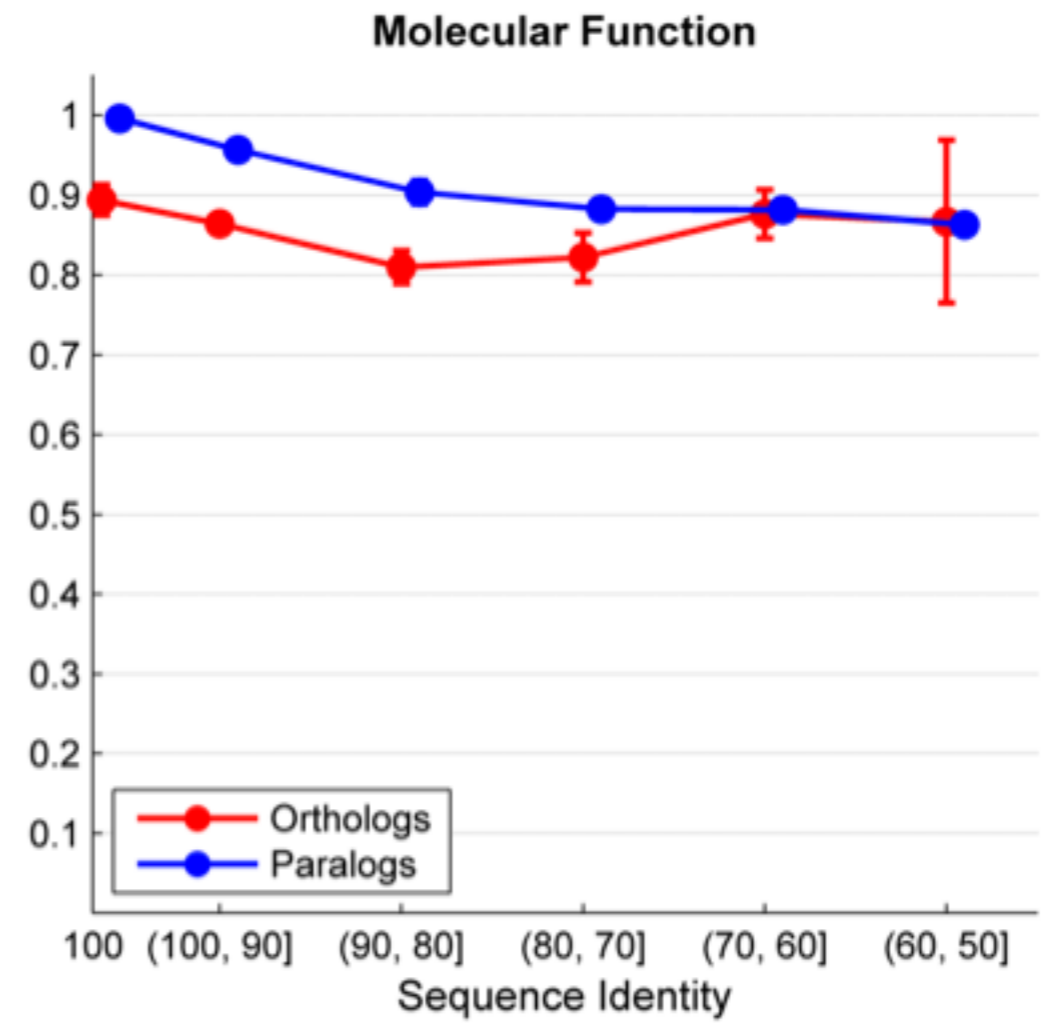

Orthologs: (827) Bins: (65) (460) (188) (72) (32) (10)  
Paralogs: (2196) Bins: (272) (174) (194) (337) (495) (724)

Figure S7D

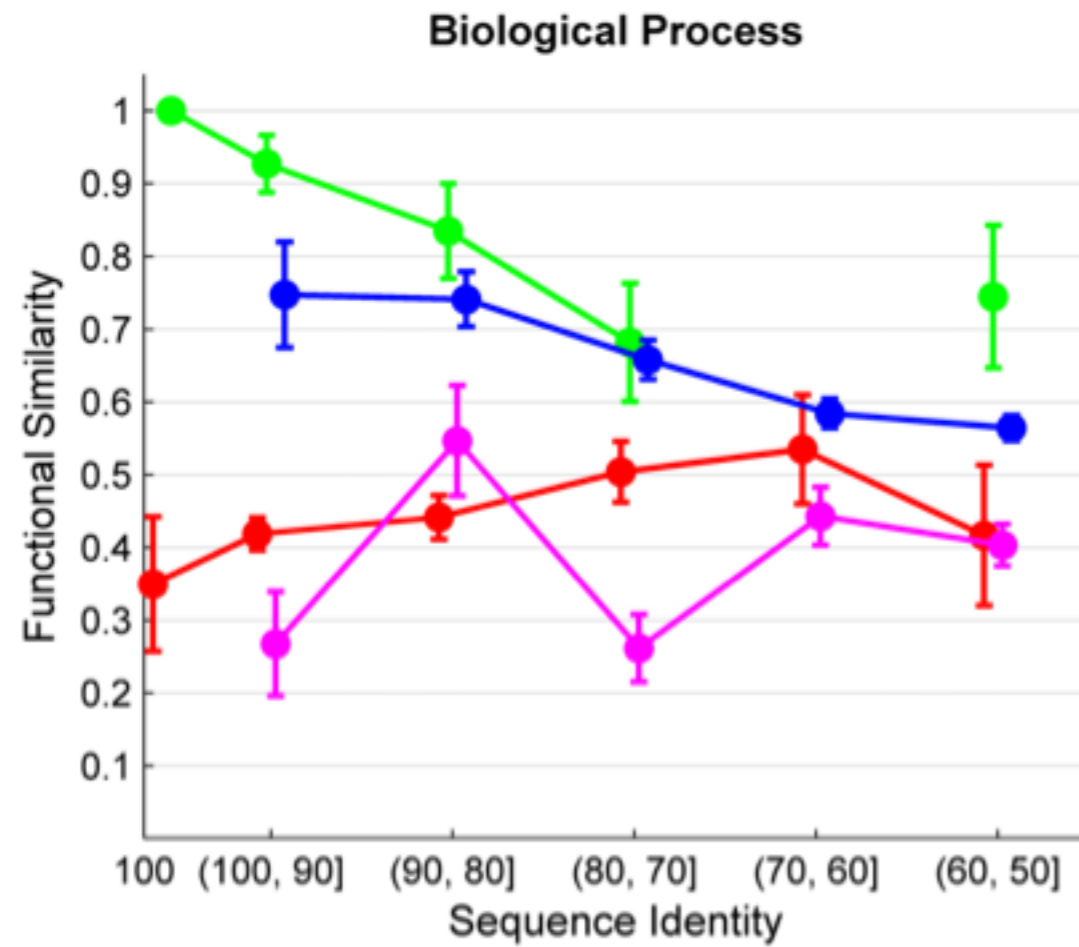

Orthologs: (414) Bins: (12) (198) (114) (55) (20) (15)  
 Inparalogs: (127) Bins: (47) (36) (21) (17) (0) (6)  
 W-s outparalogs: (886) Bins: (0) (18) (66) (161) (263) (378)  
 B-s outparalogs: (250) Bins: (0) (16) (18) (39) (70) (107)

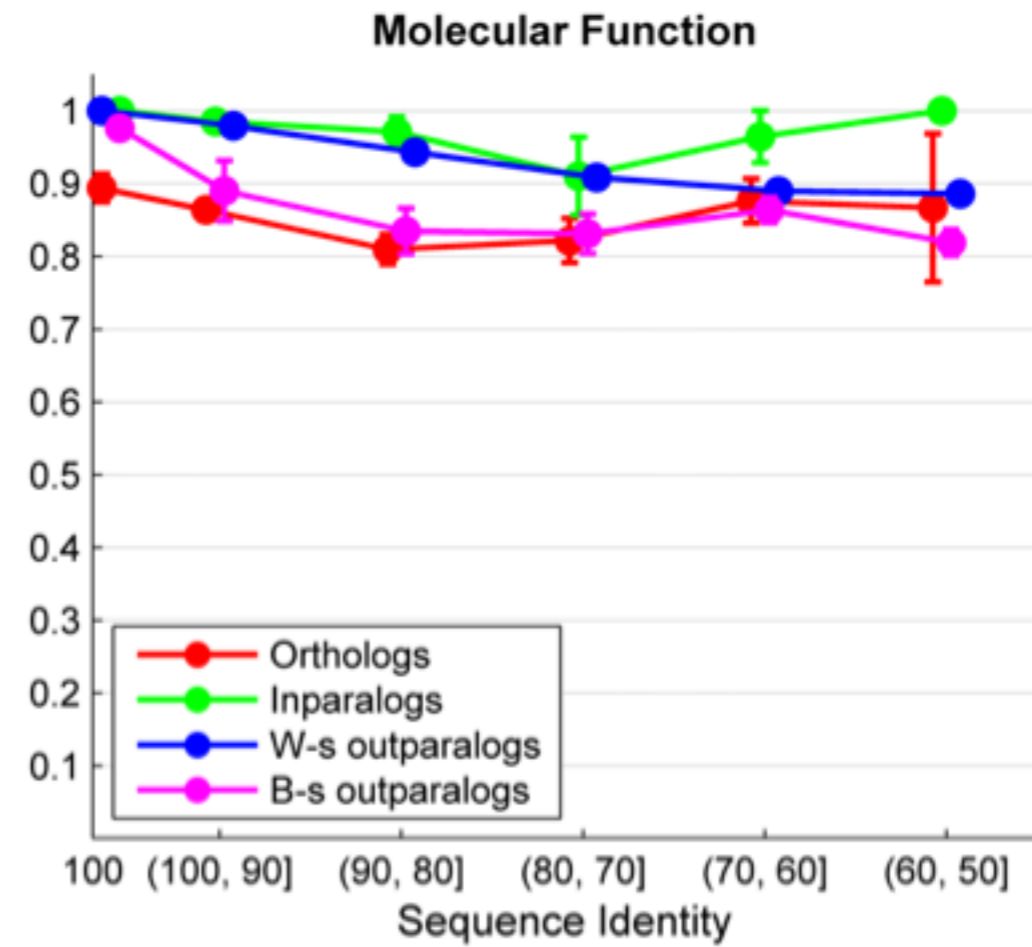

Orthologs: (827) Bins: (65) (460) (188) (72) (32) (10)  
 Inparalogs: (163) Bins: (74) (36) (20) (19) (7) (7)  
 W-s outparalogs: (1302) Bins: (149) (91) (98) (204) (307) (453)  
 B-s outparalogs: (731) Bins: (49) (47) (76) (114) (181) (264)
