# Supplementary material for: Testing the Ortholog Conjecture with Comparative Functional Genomic Data from Mammals
Source: PubMed Central journal article supplement (PMC3111532; doi:10.1371/journal.pcbi.1002073), 2011-06-09
Supplement: pcbi.1002073.s008.pdf [file pcbi.1002073.s008.pdf]

Figure S8

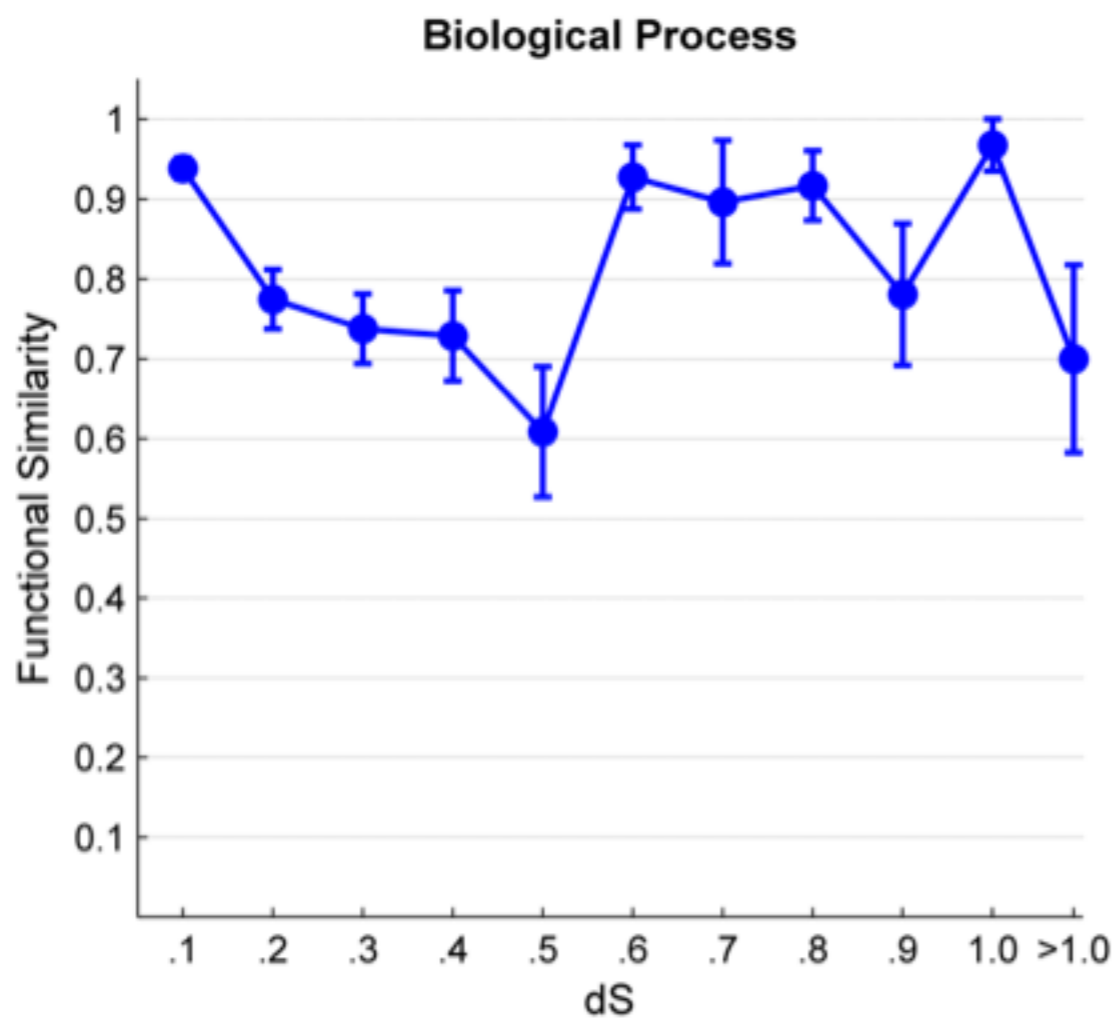

Inpara: (449) Bins: (162)(76)(50)(41)(25)(30)(13)(10)(12)(19)(11)

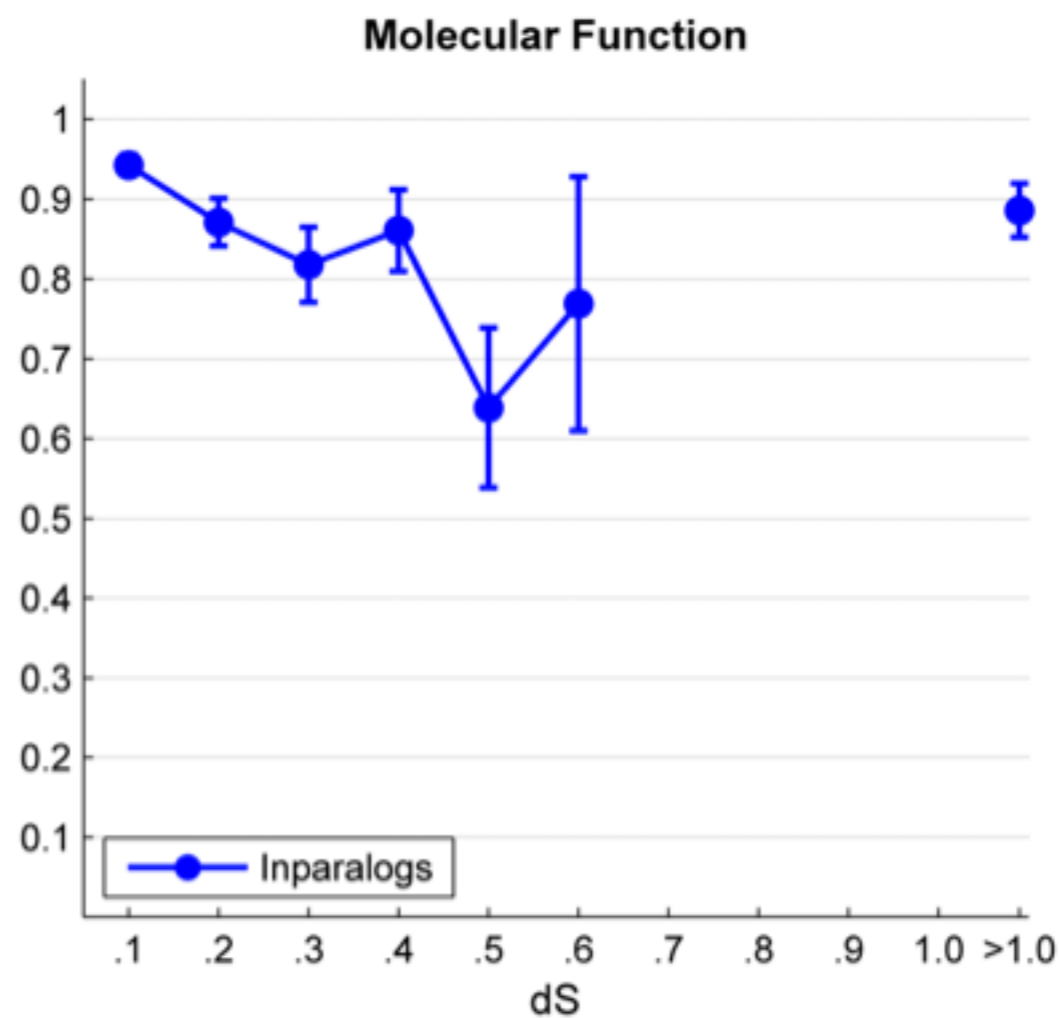

Inpara: (308) Bins: (156)(54)(36)(25)(14)(6)(0)(0)(0)(0)(17)
